# Supplementary material for: Next-generation sequencing of paired tyrosine kinase inhibitor-sensitive and -resistant EGFR mutant lung cancer cell lines identifies spectrum of DNA changes associated with drug resistance
Source: HighWire-hosted journal article supplement (doi:10.1101/gr.152322.112), 2013-06-03
Supplement: Supplemental_Material.docx [file Supplemental_Material.docx]

**Supplemental Materials**

**Next-generation sequencing of paired tyrosine kinase inhibitor-sensitive and -resistant EGFR mutant lung cancer cell lines identifies spectrum of DNA changes associated with drug resistance**

Peilin Jia,1 Hailing Jin,2 Catherine B. Meador,2 Junfeng Xia,1 Kadoaki Ohashi,2 Lin Liu,3,4 Valentina Pirazzoli,5,6 Kimberly B. Dahlman,7 Katerina Politi,5,6,8 Franziska Michor,3,4 Zhongming Zhao,1,7,9 and William Pao2,7,9

1Departments of Biomedical Informatics, 2Medicine, Vanderbilt University School of Medicine, Nashville, Tennessee 37232, USA

3Department of Biostatistics and Computational Biology, Dana-Farber Cancer Institute, Boston, Massachusetts 02215, USA

4Department of Biostatistics, Harvard School of Public Health, Boston, Massachusetts 02215, USA

5Department of Pathology, 6Yale Cancer Center, Yale University School of Medicine, New Haven, Connecticut 06510, USA

7Department of Cancer Biology, Vanderbilt University School of Medicine, Nashville, Tennessee 37232, USA

8Department of Medicine, Yale University School of Medicine, New Haven, Connecticut 06510, USA

9To whom correspondence should be addressed:

William Pao, MD, PhD

2220 Pierce Ave 777 PRB

Nashville, TN 37232

[william.pao@vanderbilt.edu](mailto:william.pao@vanderbilt.edu)

or

Zhongming Zhao, PhD

2525 West End Avenue, Suite 600

Nashville, TN 37203

[zhongming.zhao@vanderbilt.edu](file:///C:\Users\DBMIAdmin\AppData\Roaming\Microsoft\Word\zhongming.zhao@vanderbilt.edu)

**Contents**

**Supplemental Tables**

Supplemental Table S1 --------------------------------------------------------------------------- 3

Supplemental Table S2 --------------------------------------------------------------------------- 4

Supplemental Table S3 --------------------------------------------------------------------------- 5

Supplemental Table S4 --------------------------------------------------------------------------- 6

Supplemental Table S5 --------------------------------------------------------------------------- 7

Supplemental Table S6 --------------------------------------------------------------------------- 8

Supplemental Table S7 --------------------------------------------------------------------------- 9

Supplemental Table S8 --------------------------------------------------------------------------- 10

Supplemental Table S9 --------------------------------------------------------------------------- 11

Supplemental Table S10 ------------------------------------------------------------------------- 12

Supplemental Table S11 ------------------------------------------------------------------------- 13

Supplemental Table S12 ------------------------------------------------------------------------- 14

**Supplemental Figures**

Supplemental Figure S1 -------------------------------------------------------------------------- 15

Supplemental Figure S2 -------------------------------------------------------------------------- 16

Supplemental Figure S3 -------------------------------------------------------------------------- 17

Supplemental Figure S4 -------------------------------------------------------------------------- 18

Supplemental Figure S5 -------------------------------------------------------------------------- 19

Supplemental Figure S6 -------------------------------------------------------------------------- 20

Supplemental Figure S7 -------------------------------------------------------------------------- 21

Supplemental Figure S8 -------------------------------------------------------------------------- 22

Supplemental Figure S9 -------------------------------------------------------------------------- 23

Supplemental Figure S10 ------------------------------------------------------------------------- 24

**Table S1.** List of validated SNVs and indels in PC-9/ER cells (Each row is for one transcript and multiple transcripts of each gene are listed.)

| **Gene** | **Chr.*** | **Position (bp)** | **RefSeq** | **Nucleotide change** | **Amino acid change** | **Tumor var freq**** |
| --- | --- | --- | --- | --- | --- | --- |
| SNVs |  |  |  |  |  |  |
| *KIF17* | 1 | 20998644 | NM_020816 | c.C2509T | p.Q837X | 41.38% |
|  |  |  | NM_001122819 | c.C2509T | p.Q837X |  |
| *GPR61* | 1 | 110085927 | NM_031936 | c.C283T | p.P95S | 43.75% |
| *PKP4* | 2 | 159477811 | NM_001005476 | c.G481C | p.G161R | 50% |
|  |  |  | NM_003628 | c.G481C | p.G161R |  |
| *SRGAP3* | 3 | 9032400 | NM_001033117 | c.C2610A | p.S870R | 58.82% |
|  |  |  | NM_014850 | c.C2682A | p.S894R |  |
| *ZNF445* | 3 | 44489533 | NM_181489 | c.G1630A | p.D544N | 42.42% |
| *ATP8A1* | 4 | 42551076 | NM_006095 | c.G1606C | p.G536R | 20.83% |
|  |  |  | NM_001105529 | c.G1561C | p.G521R |  |
| *AFAP1L1* | 5 | 148702274 | NM_152406 | c.G1804A | p.A602T | 27.27% |
|  |  |  | NM_001146337 | c.G1804A | p.A602T |  |
| ***EGFR*** | **7** | **55249071** | **NM_005228** | **c.C2369T** | **p.T790M** | **21.92%** |
| *LIN7C* | 11 | 27528284 | NM_018362 | c.G16T | p.E6X | 26.67% |
| *SF1* | 11 | 64535163 | NM_201997 | c.C1222T | p.H408Y | 21.62% |
|  |  |  | NM_201998 | c.C1222T | p.H408Y |  |
|  |  |  | NM_201995 | c.C1222T | p.H408Y |  |
|  |  |  | NM_001178030 | c.C1597T | p.H533Y |  |
|  |  |  | NM_001178031 | c.C1144T | p.H382Y |  |
|  |  |  | NM_004630 | c.C1222T | p.H408Y |  |
| *BIRC3* | 11 | 102195950 | NM_182962 | c.A710T | p.N237I | 25.84% |
|  |  |  | NM_001165 | c.A710T | p.N237I |  |
| *CPNE8* | 12 | 39161493 | NM_153634 | c.C519A | p.D173E | 42.11% |
| *GNPTG* | 16 | 1412518 | NM_032520 | c.G592T | p.E198X | 36.67% |
| *PDILT* | 16 | 20387492 | NM_174924 | c.G441C | p.W147C | 34.04% |
| *AOC2* | 17 | 40997679 | NM_009590 | c.G1036C | p.V346L | 25% |
|  |  |  | NM_001158 | c.G1036C | p.V346L |  |
| *TSGA10#* | 2 | 99720494 | NM_182911 | c.G547A | p.A183T | 27.78% |
|  |  |  | NM_025244 | c.G547A | p.A183T |  |
| *FRAS1*# | 4 | 79238630 | NM_001166133 | c.A1928T | p.E643V | 59.09% |
|  |  |  | NM_025074 | c.A1928T | p.E643V |  |
| *SEC24D*# | 4 | 119738478 | NM_014822 | c.C338G | p.S113C | 41.46% |
| *ATP2A1*# | 16 | 28914722 | NM_004320 | c.G2941A | p.D981N | 46.15% |
|  |  |  | NM_173201 | c.G2941A | p.D981N |  |
| *GRIN3B*# | 19 | 1003585 | NM_138690 | c.G883T | p.D295Y | 55.56% |
| Indels |  |  |  |  |  |  |
| *ZNF385B* | 2 | 180383295-180383297 | NM_001113398 | c.159_161del | p.53_54del | 20.75% |
|  |  |  | NM_152520 | c.465_467del | p.155_156del |  |
|  |  |  | NM_001113397 | c.237_239del | p.79_80del |  |
| *ACACA* | 17 | 35601597-35601602 | NM_198834 | c.2644_2649del | p.882_883del | 34.55% |
|  |  |  | NM_198838 | c.2299_2304del | p.767_768del |  |
|  |  |  | NM_198837 | c.2359_2364del | p.787_788del |  |
|  |  |  | NM_198839 | c.2533_2538del | p.845_846del |  |
|  |  |  | NM_198836 | c.2533_2538del | p.845_846del |  |
| *FAM122C* | X | 133941611-133941611 | NM_001170780 | c.91delT | p.L31fs | 38.60% |
| *LRCH2* | X | 114391202-114391204 | NM_020871 | c.1490_1492del | p.497_498del | 33.33% |
| *TBC1D8B* | X | 106069294-106069314 | NM_017752 | c.862_882del | p.288_294del | 52.63% |
|  |  |  | NM_198881 | c.862_882del | p.288_294del |  |
| *ZNF793* | 19 | 38028414- 38028414 | NM_001013659 | c.854_855insT | p.C285fs | 20.75% |

*Chr.: chromosomes.  **Var freq: variant frequency. # These genes are missed by our stringent filtering criteria but were confirmed by Sanger resequencing.

**Table S2.** CNV regions in PC-9/ER

| **Cytoband** | **Start (Mb)** | **End (Mb)** | **Copy**  **number** | **Size (Mb)** | **CGC* genes** |
| --- | --- | --- | --- | --- | --- |
| *Amplification* |  |  |  |  |  |
| 2p25.3 | 0 | 0.79 | 3-4 | 0.79 |  |
| 5p15.1-p15.2 | 11.53 | 15.28 | 3 | 3.74 |  |
| 7p11.2-p13 | 43.36 | 55.33 | 3 | 11.97 | *EGFR, IKZF1* |
| 7q32.3 | 130.50 | 130.63 | 3 | 0.13 |  |
| 22q12.3-q13.1 | 35.99 | 39.24 | 3 | 3.25 | *MYH9* |
| *Deletion* |  |  |  |  |  |
| 2q22.1 | 141.73 | 142.17 | 1 | 0.44 |  |
| 2q32 | 189.12 | 197.88 | 1 | 8.76 | *PMS1* |
| 2q34 | 202.75 | 214.48 | 1 | 11.73 | *CREB1, IDH1* |
| 7q31.1-q32.3 | 112.95 | 130.5 | 1 | 17.55 | *MET* |
| 7q32.3-q33 | 130.63 | 133.53 | 1 | 2.9 |  |
| 7q33-q35 | 134.71 | 146.79 | 1 | 12.07 | *BRAF, CREB3L2, KIAA1549* |
| 9q13 | 66.93 | 67.04 | 1 | 0.11 |  |
| 10p14-p15.3 | 0.00 | 11.77 | 1 | 11.77 |  |
| 10p11.21-p12.32 | 11.77 | 35.58 | 1 | 23.81 | *ABI1, MLLT10, KIF5B* |
| 15q25.2 | 82.89 | 83.02 | 1 | 0.13 |  |
| 22q11.21 | 20.34 | 20.49 | 1 | 0.15 |  |
| Xp11.4-p21.1 | 35.38 | 38.4 | 1 | 3.02 |  |

* CGC: Cancer Gene Census.

**Table S3.** List of validated SNVs in cell line PC-9/BRc1

| **Gene** | **Chr. *** | **Position (bp)** | **RefSeq** | **Nucleotide change** | **Amino acid change** | **Tumor var freq**** |
| --- | --- | --- | --- | --- | --- | --- |
| *LRP1B* | 2 | 141214142 | NM_018557 | c.G9845T | p.G3282V, | 37.77% |
| *LRP1B* | 2 | 141459727 | NM_018557 | c.C6285A | p.Y2095X, | 28.71% |
| *LRP1B* | 2 | 141660570 | NM_018557 | c.G3685T | p.E1229X, | 40.13% |
| *RFX6* | 6 | 117240392 | NM_173560 | c.A1115T | p.K372I, | 26.43% |
| *AHI1* | 6 | 135644437 | NM_001134831 | c.C3191T | p.A1064V,AHI1 | 59.26% |
|  |  |  | NM_001134830 | c.C3191T | p.A1064V,AHI1 | |
|  |  |  | NM_017651 | c.C3191T | p.A1064V, | |
| *EGFR* | 7 | 55249071 | NM_005228 | c.C2369T | p.T790M, | 33.24% |
| *MLL2* | 12 | 49434397 | NM_003482 | c.C7156T | p.R2386W, | 37.74% |
| *PCDH9* | 13 | 67800964 | NM_203487 | c.C1609T | p.R537X,PCDH9 | 20% |
|  |  |  | NM_020403 | c.C1609T | p.R537X, |  |
| *CDH24* | 14 | 23524547 | NM_144985 | c.G217A | p.D73N,CDH24 | 35.34% |
|  |  |  | NM_022478 | c.G217A | p.D73N, |  |
| *HIRA* | 22 | 19343811 | NM_003325 | c.G2397T | p.W799C, | 60.66% |
| *ATRX* | X | 76875965 | NM_000489 | c.C5170A | p.L1724I,ATRX | 41.67% |
|  |  |  | NM_138270 | c.C5056A | p.L1686I, |  |

*Chr.: chromosomes. **Var freq: variant frequency.

**Table S4.** CNV regions in PC-9/BRc1

| **Cytoband** | **Start (Mb)** | **End (Mb)** | **Copy number** | **Size (Mb)** | **CGC* genes** |
| --- | --- | --- | --- | --- | --- |
| *Amplification* | | | | | |
| 1p36.21-p36.33 | 0.75 | 13.93 | 4.78 | 13.19 | *CAMTA1, PRDM16, RPL22, TNFRSF14* |
| 3q13.13-q27.3 | 111.26 | 187.45 | 3.00 | 76.19 | *BCL6, EIF4A2, ETV5, FOXL2, GATA2, GMPS, MECOM, MLF1, PIK3CA, RPN1, SOX2, WWTR1* |
| 4q33-q35.2 | 172.74 | 190.86 | 3.33 | 18.13 |  |
| 7q11.21-q11.22 | 64.25 | 71.28 |  | 7.02 | *SBDS* |
| 10q26.11-q26.3 | 121.54 | 134.92 | 3.89 | 13.38 | *FGFR2* |
| 13q32.1-q34 | 96.41 | 99.08 | 3 | 2.67 |  |
| 14q21.2-q24.3 | 42.37 | 75.47 | 3.68 | 33.10 |  |
| 15q26.2-q26.3 | 96.87 | 101.87 | 3.00 | 5.00 |  |
| 16q23.3-q24.3 | 83.38 | 90.03 | 3.92 | 6.65 | *CBFA2T3, FANCA* |
| 19q13.32-q13.41 | 47.71 | 52.73 | 3.00 | 5.02 | *KLK2, PPP2R1A* |
| 21p11.1-q22.3 | 9.91 | 48.08 | 3.33 | 38.18 | *ERG, OLIG2, RUNX1, TMPRSS2, U2AF1* |
| 22q13.2-q13.33 | 43.09 | 51.19 | 4.40 | 8.10 |  |
| Xp21.1 | 35.82 | 37.67 | 4.50 | 1.85 |  |
| *Deletion* | | | | | |
| 2q22.2-q31.1 | 142.57 | 171.40 | 1.00 | 28.83 |  |
| 2q33.1 | 197.89 | 202.74 | 1.00 | 4.85 | *SF3B1* |
| 2q34-q35 | 214.73 | 217.06 | 1.00 | 2.33 | *ATIC* |
| 2q36.3-q37.1 | 227.66 | 233.43 | 1.00 | 5.77 |  |
| 2q37.2 | 236.79 | 237.03 | 1.00 | 0.24 |  |
| 3q11.2 | 96.53 | 96.96 | 1.00 | 0.43 |  |
| 4q12 | 53.46 | 54.55 | 1.00 | 1.08 | *FIP1L1* |
| 5p14.3-p15.33 | 0.14 | 20.31 | 1.00 | 20.16 |  |
| 5p12-p14.3 | 21.98 | 45.65 | 1.00 | 23.67 | *IL7R, LIFR* |
| 6p25.3 | 0.11 | 0.29 | 1.00 | 0.19 |  |
| 6q12 | 64.29 | 66.21 | 1.00 | 1.92 |  |
| 6q12-q27 | 69.35 | 170.89 | 1.00 | 101.54 | *ECT2L, EZR, FGFR1OP, FOXO3, GOPC, MLLT4, MYB, PRDM1, ROS1, TNFAIP3* |
| 7q35-q36.3 | 147.08 | 158.94 | 1.00 | 11.86 | *EZH2, MLL3, MNX1* |
| 8q21.13-q21.2 | 85.44 | 86.09 | 1.00 | 0.65 |  |
| 9p11.1-q34.3 | 40.70 | 141.11 | 1.00 | 100.42 | *ABL1, BRD3, FANCC, GNAQ, NUP214, OMD, PTCH1, RALGDS, SYK, TSC1, XPA* |
| 10p11.1-p15.3 | 0.09 | 38.69 | 1.00 | 38.59 | *ABI1, GATA3, KIF5B, KLF6, MLLT10* |
| 11p11.2-p12 | 36.68 | 45.31 | 1.00 | 8.63 | *EXT2* |
| 11q13.4 | 74.55 | 74.65 | 1.00 | 0.11 |  |
| 12p13.33 | 0.18 | 1.92 | 1.00 | 1.74 | *ERC1, KDM5A* |
| 14q24.3-q32.33 | 76.09 | 107.28 | 1.00 | 31.19 | *BCL11B, DICER1, GOLGA5, TCL1A, TRIP11, TSHR, AKT1* |
| 17q25.1-q25.3 | 73.66 | 81.05 | 1.00 | 7.39 | *ASPSCR1, CANT1, RNF213, SEPT9, SRSF2* |
| 18p11.32 | 0.16 | 0.63 | 1.00 | 0.46 |  |
| 19p13.3 | 0.07 | 1.13 | 1.00 | 1.06 |  |
| 20p13 | 0.07 | 0.37 | 1.00 | 0.30 |  |
| 20p11.1- q13.12 | 17.92 | 45.36 | 1.00 | 27.44 | *ASXL1, MAFB, TOP1, SDC4* |
| 22q12.3-q13.1 | 36.00 | 40.07 | 1.00 | 4.06 | *MYH9, PDGFB* |

* CGC: Cancer Gene Census.

**Table S5.** List of validated SNVs in cell line HCC827/R1

| **Gene** | **Chr. *** | **Position (bp)** | **RefSeq** | **Nucleotide change** | **Amino acid change** | **Tumor var freq**** |
| --- | --- | --- | --- | --- | --- | --- |
| *C1orf87* | 1 | 60476121 | NM_152377 | c.A1135T | p.N379Y | 23.59% |
| *TTC13* | 1 | 231067615 | NM_024525 | c.G992A | p.G331D | 20.75% |
|  |  |  | NM_001122835 | c.G833A | p.G278D |  |
| *LRP1B* | 2 | 141093341 | NM_018557 | c.G11959A | p.D3987N | 25.88% |
| *ADCY5* | 3 | 123044280 | NM_183357 | c.G1977A | p.M659I | 20% |
|  |  |  | NM_001199642 | c.G927A | p.M309I |  |
| *CPEB2* | 4 | 15009978 | NM_182485 | c.A1961G | p.Q654R | 25% |
|  |  |  | NM_001177382 | c.A1961G | p.Q654R |  |
| *TLR2* | 4 | 154625931 | NM_003264 | c.G1872A | p.W624X | 30.19% |
| *NOS3* | 7 | 150693625 | NM_001160110 | c.A404G | p.Y135C | 38.46% |
|  |  |  | NM_000603 | c.A404G | p.Y135C |  |
|  |  |  | NM_001160109 | c.A404G | p.Y135C |  |
|  |  |  | NM_001160111 | c.A404G | p.Y135C |  |
| *MYH1* | 17 | 10411873 | NM_005963 | c.G1704T | p.K568N | 20.30% |
| *SFRP1*# | 8 | 41122998 | NM_003012 | c.G633A | p.M211I | 29.03% |

*Chr.: chromosomes.

**Var freq: variant frequency.

# These genes were missed by our stringent filtering criteria but were confirmed by Sanger resequencing.

**Table S6.** CNV regions in HCC827/R1

| **Cytoband** | **Start (Mb)** | **End (Mb)** | **Copy**  **number** | **Size (Mb)** | **CGC* genes** |
| --- | --- | --- | --- | --- | --- |
| *Amplification* |  |  |  |  |  |
| 7p12.1-p22.3 | 0.54 | 51.26 | 3 | 50.72 | *CARD11, ETV1, HNRNPA2B1, HOXA11, HOXA13, HOXA9, IKZF1, PMS2* |
| 7q11.21 | 62.91 | 158.94 | 3.80 | 82.11 | *SBDS, AKAP9, CDK6, MET, SMO, CREB3L2, KIAA1549, BRAF, EZH2, MLL3, MNX1* |
| 12q13.13 | 54.74 | 54.89 | 3 | 0.16 |  |
| 17q12 | 35.31 | 37.12 | 3.88 | 1.14 | *LASP1, MLLT6* |
| 18p11.22 | 8.83 | 9.20 | 4 | 0.37 |  |
| 18q11.2-q23 | 22.80 | 78.01 | 4.076 | 55.20 | *SS18, ZNF521, MALT1, SMAD4, BCL2, KDSR* |
| 21p11.1-q22.3 | 9.59 | 45.92 | 3.5 | 36.33 | *ERG, OLIG2, RUNX1, TMPRSS2, U2AF1* |
| *Deletion* |  |  |  |  |  |
| 11q12.1 | 57.19 | 57.32 | 1 | 0.13 |  |
| 12p12.2-p13.33 | 0.07 | 20.83 | 1 | 20.76 | *CCND2, ERC1, ETV6, KDM5A, ZNF384* |
| 17q21.2 | 39.15 | 39.43 | 1 | 0.28 |  |
| 18q11.2 | 21.10 | 22.06 | 1 | 0.96 |  |
| 2q11.2 | 97.51 | 97.69 | 1 | 0.18 |  |
| 5p11-q35.3 | 0.14 | 180.69 | 1 | 180.55 | *ACSL6, AFF4, APC, ARHGAP26, CD74, EBF1, IL6ST, IL7R, ITK, LIFR, NPM1, NSD1, PDGFRB, PIK3R1, RANBP17, TLX3* |
| 7p11.2-p12.1 | 51.29 | 57.52 | 1 | 6.24 | *EGFR* |
| 8p11.21-p11.22 | 38.95 | 40.53 | 4 | 1.58 |  |

* CGC: Cancer Gene Census.

**Table S7.** List of validated SNVs in cell line HCC827/R2

| **Gene** | **Chr.*** | **Position (bp)** | **RefSeq** | **Nucleotide change** | **Amino acid change** | **Tumor var freq**** |
| --- | --- | --- | --- | --- | --- | --- |
| *PPM1B* | 2 | 44428427 | NM_001033557 | c.A89C | p.Q30P | 26.27% |
|  |  |  | NM_002706 | c.A89C | p.Q30P |  |
|  |  |  | NM_001033556 | c.A89C | p.Q30P |  |
|  |  |  | NM_177968 | c.A89C | p.Q30P |  |
| *PIKFYVE* | 2 | 209218871 | NM_015040 | c.G6094T | p.V2032F | 26.42% |
| *COL4A3* | 2 | 228172569 | NM_000091 | c.C4396G | p.P1466A | 25.22% |
| *PRUNE2* | 9 | 79469101 | NM_015225 | c.G60T | p.K20N | 30% |
| *IPPK* | 9 | 95397576 | NM_022755 | c.G931C | p.E311Q | 24.44% |
| *HIPK3* | 11 | 33360958 | NM_005734 | c.A1491T | p.E497D | 45.97% |
|  |  |  | NM_001048200 | c.A1491T | p.E497D |  |
| *DNAH9* | 17 | 11872719 | NM_004662 | c.T2272A | p.Y758N | 20.35% |
|  |  |  | NM_001372 | c.T13336A | p.Y4446N |  |
| *MYO15A* | 17 | 18058678 | NM_016239 | c.C8391G | p.I2797M | 28.21% |
| *ITGA3* | 17 | 48151895 | NM_002204 | c.C1466T | p.S489F | 21.98% |
|  |  |  | NM_005501 | c.C1466T | p.S489F |  |
| *C19orf57* | 19 | 14000422 | NM_024323 | c.C1247T | p.T416I | 22.73% |
| *ZNF573* | 19 | 38230827 | NM_152360 | c.A390T | p.K130N | 48.09% |
|  |  |  | NM_001172692 | c.A300T | p.K100N |  |
|  |  |  | NM_001172689 | c.A300T | p.K100N |  |
|  |  |  | NM_001172691 | c.A558T | p.K186N |  |
|  |  |  | NM_001172690 | c.A564T | p.K188N |  |
| *AIFM3* | 22 | 21331162 | NM_001018060 | c.G1153C | p.E385Q | 51.56% |
|  |  |  | NM_001146288 | c.G1171C | p.E391Q |  |
|  |  |  | NM_144704 | c.G1153C | p.E385Q |  |
| *DDX3X* | X | 41205842 | NM_001356 | c.C1582T | p.R528C | 43.03% |
|  |  |  | NM_001193417 | c.C1534T | p.R512C |  |
|  |  |  | NM_001193416 | c.C1582T | p.R528C |  |
| *IL1RAPL2* | X | 105011627 | NM_017416 | c.G2034T | p.E678D | 30.29% |
| *F9* | X | 138642963 | NM_000133 | c.G787C | p.V263L | 30.27% |
| *SLC36A2*# | 5 | 150718671 | NM_181776 | c.C475G | p.L159V | 18.06% |

*Chr.: chromosomes.

**Var freq: variant frequency.

# These genes were missed by our stringent filtering criteria but were confirmed by Sanger resequencing.

**Table S8.** CNV regions (>100kb) in HCC827/R2

| **Cytoband** | **Start (Mb)** | | | **End (Mb)** | **Copy**  **number** | **Size (Mb)** | **CGC*** **genes** |
| --- | --- | --- | --- | --- | --- | --- | --- |
| *Amplification* |  |  | | |  |  |  |
| 5p15.2-p15.33 | 0.14 | | 11.73 | | 3 | 11.59 |  |
| 7q21.3-q31.1 | 97.49 | | 108.16 | | 4.45 | 10.67 |  |
| 7q31.1-q31.31 | 111.85 | | 117.88 | | 5 | 6.03 | *MET* |
| 18q11.2 | 21.21 | | 21.78 | | 3.83 | 0.56 |  |
|  |  | |  | |  |  |  |
| *Deletion* |  | |  | |  |  |  |
| 1p22.1 | 93.65 | | 93.83 | | 1 | 0.17 |  |
| 1p13.2 | 115.40 | | 115.54 | | 1 | 0.14 |  |
| 1q32.3 | 213.25 | | 213.44 | | 1 | 0.19 |  |
| 7p14.3 | 32.11 | | 32.86 | | 1 | 0.75 |  |
| 7q31.31-q36.3 | 119.91 | | 158.94 | | 1 | 39.02 | *BRAF,CREB3L2,EZH2,KIAA1549,MLL3,MNX1,SMO* |
| 9p22.3 | 15.27 | | 15.68 | | 1 | 0.41 | *PSIP1* |
| 9p22.2 | 17.23 | | 17.76 | | 1 | 0.54 |  |
| 18q11.2-q23 | 21.86 | | 77.96 | | 1 | 56.10 | *BCL2,KDSR,MALT1,SMAD4,SS18,ZNF521* |
| 20q11.21-q11.22 | 29.62 | | 32.44 | | 1 | 2.82 | *ASXL1* |
| 20q11.22-q11.23 | 34.00 | | 35.18 | | 1 | 1.18 |  |

* CGC: Cancer Gene Census.

**Table S9.** List of validated SNVs in cell line HCC4006/ER

| **Gene** | **Chr.*** | **Position (bp)** | **RefSeq** | **Nucleotide change** | **Amino acid change** | **Tumor var freq**** |
| --- | --- | --- | --- | --- | --- | --- |
| *APOB* | 2 | 21233340 | NM_000384 | c.C6400A | p.Q2134K | 32.81% |
| *GABRB2* | 5 | 160837999 | NM_000813 | c.A523C | p.T175P | 20.22% |
|  |  |  | NM_021911 | c.A523C | p.T175P |  |
| *MDN1* | 6 | 90428335 | NM_014611 | c.A6333G | p.I2111M | 31.12% |
| *RUNDC3B* | 7 | 87445550 | NM_138290 | c.C1249A | p.Q417K | 25.40% |
|  |  |  | NM_001134406 | c.C1051A | p.Q351K |  |
|  |  |  | NM_001134405 | c.C1198A | p.Q400K |  |
| *OPRK1* | 8 | 54147411 | NM_000912 | c.T518G | p.L173W | 31.51% |
| *DNAJB5* | 9 | 34996685 | NM_012266 | c.A635G | p.H212R | 21.57% |
|  |  |  | NM_001135004 | c.A737G | p.H246R |  |
|  |  |  | NM_001135005 | c.A851G | p.H284R, |  |
| *MON2* | 12 | 62926233 | NM_015026 | c.C1416A | p.D472E | 30.95% |
| *CCDC33* | 15 | 74627461 | NM_182791 | c.G1052C | p.G351A | 24.32% |
| *ITSN1* | 21 | 35258716 | NM_003024 | c.G4969A | p.E1657K | 60% |

*Chr.: chromosomes.

**Var freq: variant frequency.

**Table S10.** Distribution of SNVs in 5’ versus 3’ UTRs and within the gene body across the different cell lines.

|  | **5’-UTR** | **3’-UTR** | **Gene body*** |
| --- | --- | --- | --- |
| PC-9/S1 | 3 | 2 | 4 |
| PC-9/ER | 8 | 2 | 23 |
| PC-9/S2 | 6 | 3 | 18 |
| PC-9/BRc1 | 10 | 3 | 76 |
| HCC827 *vs.* HCC827/R1 | 2 | 0 | 6 |
| HCC827/R1 | 1 | 1 | 10 |
| HCC827/R2 | 4 | 1 | 21 |
| HCC4006 | 3 | 0 | 9 |
| HCC4006/ER | 1 | 3 | 16 |

*We excluded those SNVs that failed in experimental validation. Therefore the numbers here may not match exactly to those listed in Table 2. Gene body indicates all the regions in a gene excluding the 5’- and 3’-UTRs.

**Table S11.** Summary of kinase genes harboring non-silent SNVs/indels in each cell line.

|  | **PC-9 /S1** | **PC-9 /ER** | **PC-9 /S2** | **PC-9 /BRc1** | **HCC827** | | **HCC827 /R1** | **HCC827 /R2** | **HCC4006** | **HCC4006 /ER** |
| --- | --- | --- | --- | --- | --- | --- | --- | --- | --- | --- |
| **vs. R1** | **vs. R2** |
| By SNV | 0 | *EGFR** | *MAP3K3* | *EGFR** | 0 | 0 | 0 | *HIPK3* | *TESK2* | 0 |
| By indel | 0 | *MAP3K4* | 0 | 0 | 0 | 0 | *TBCK* | 0 | 0 | 0 |

***Mutations involved in phosphorylation sites.

**Table S12.** Lists of exonic variants in all cell lines (please refer to the separate Excel file, Supplemental Table 12.xlsx).


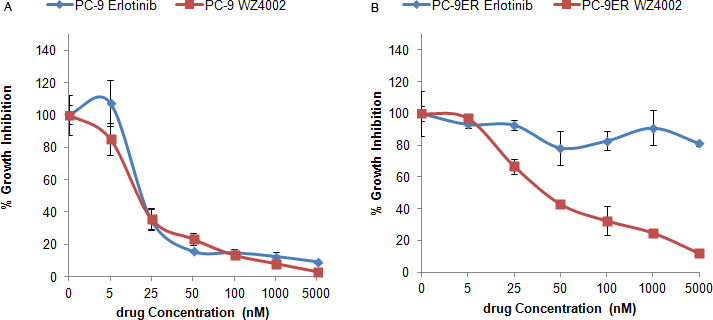


**Figure S1.** Effect of erlotinib and WZ4002 (T790M-specific small molecule) on the growth of PC-9 (A) and PC-9/ER cells (B). The data suggest that PC-9/ER still depend upon EGFR signaling for survival.


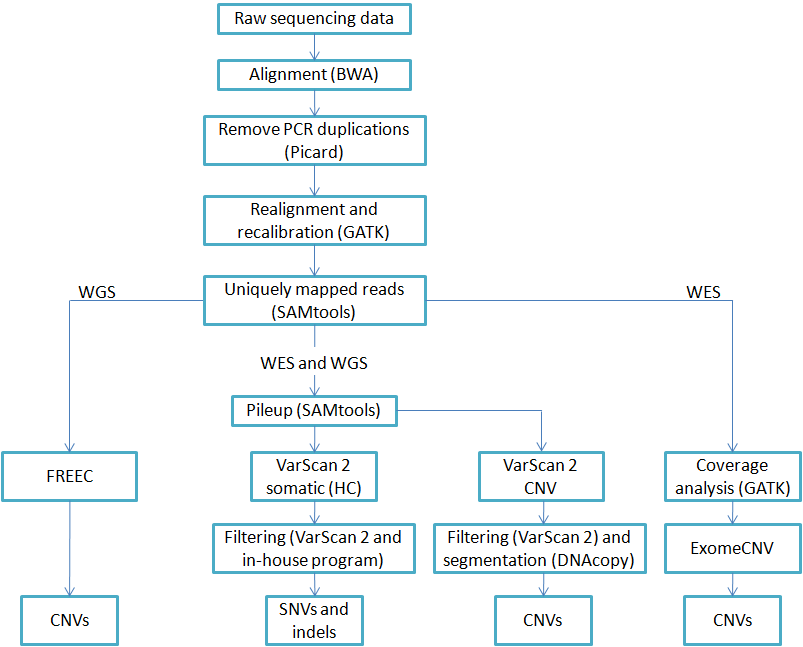


**Figure S2.** Analysis pipeline. The process to call SNVs and small insertions and deletions (indels) was the same for whole genome sequencing (WGS) and whole exome sequencing (WES) data but was different for calling copy number variations. HC: high confidence.


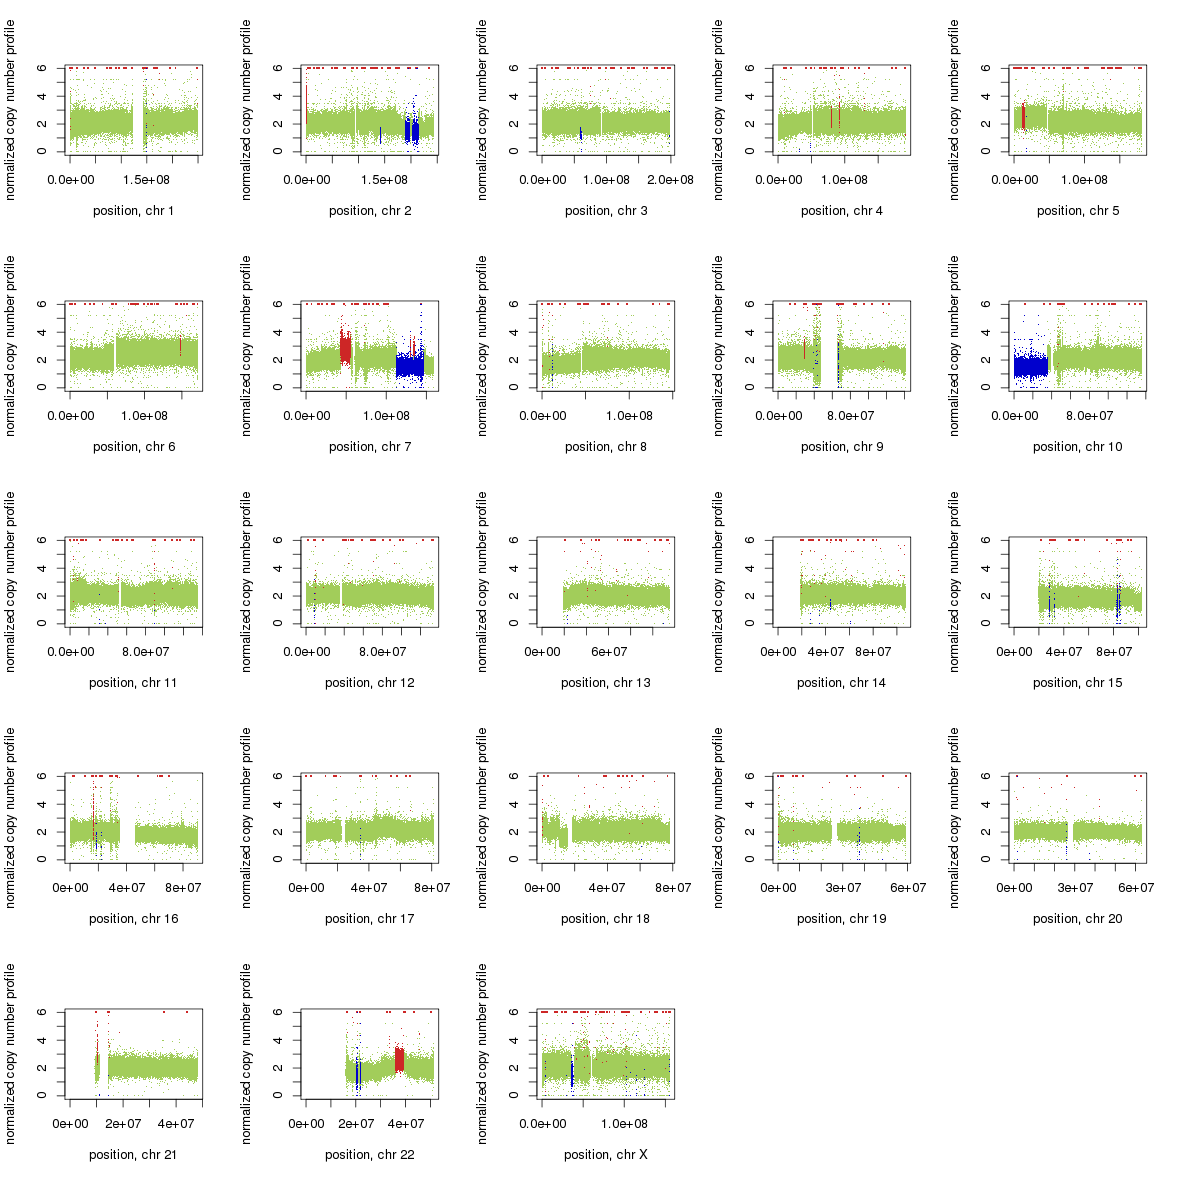


**Figure S3.** Copy number variation (CNV) changes in PC-9/ER compared to PC-9/S1 by Control-FREEC. Red: CNV gain; blue: CNV loss; green: no change.


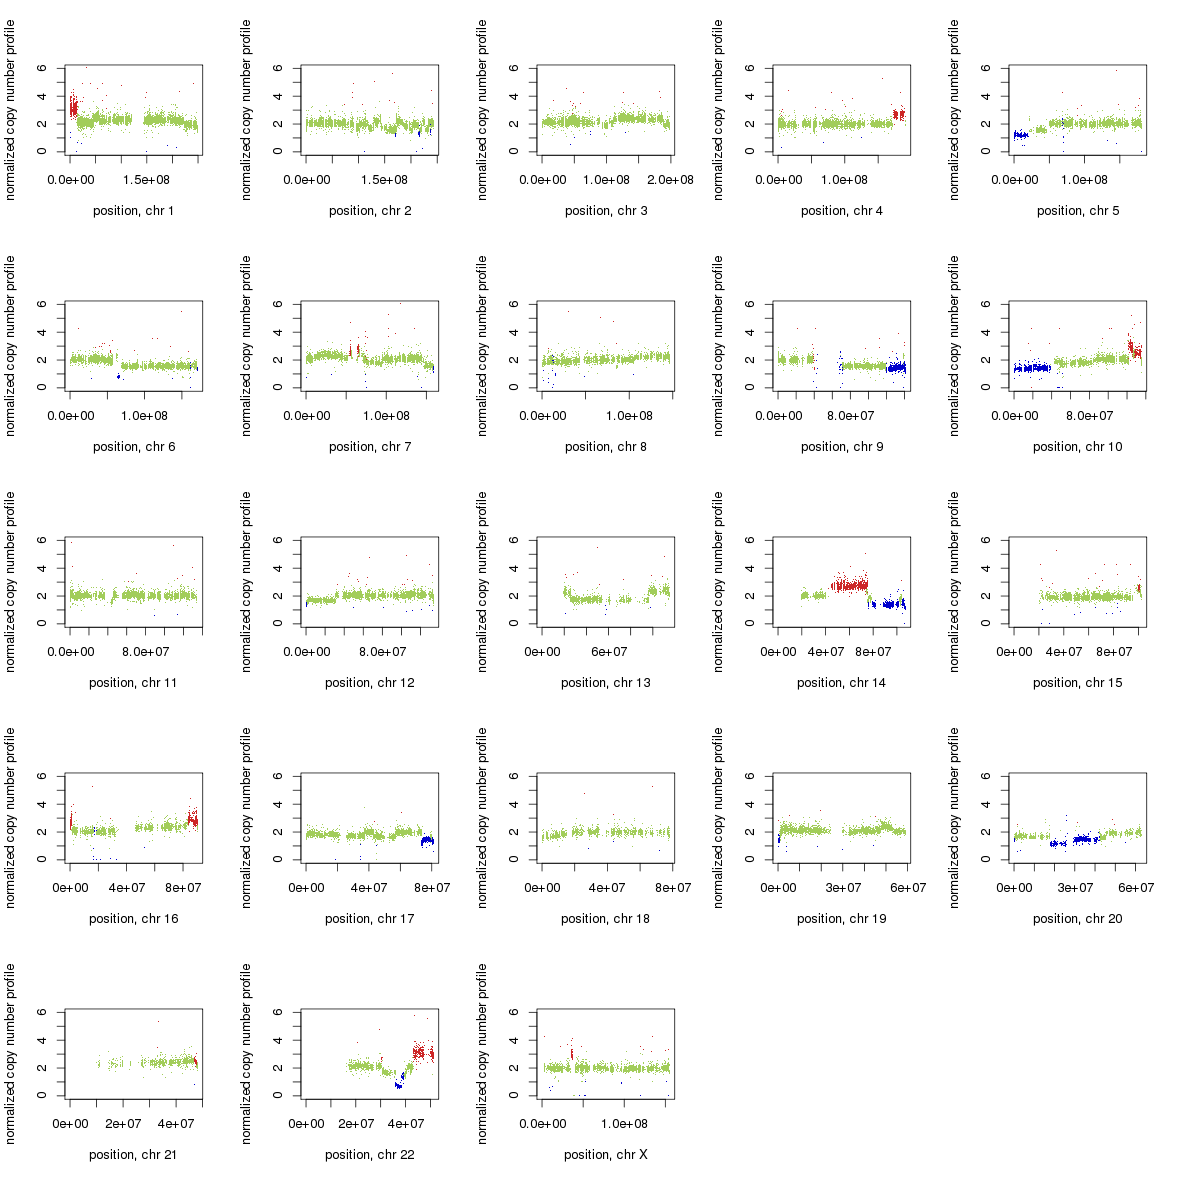


**Figure S4.** Copy number variation (CNV) changes in PC-9/BRc1 compared to PC-9/S2. Red: CNV gain; blue: CNV loss; green: no change.


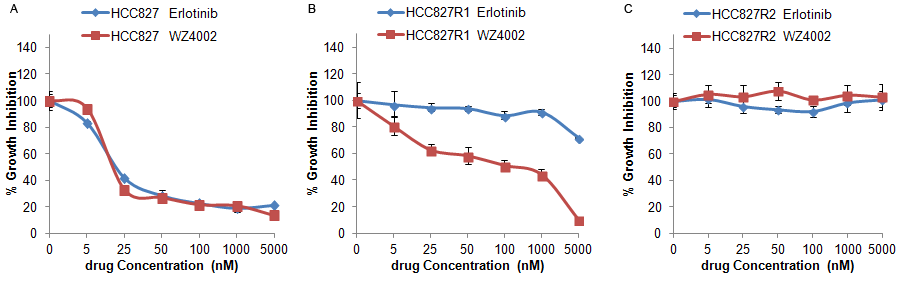


**Figure S5.** Effect of erlotinib and WZ4002 (T790M-specific small molecule) on the growth of HCC827 (A), HCC827/R1 (B), and HCC827/R2 (C) cells. The data suggest that HCC827/R1 but not HCC827/R2 cells still depend upon EGFR signaling for survival.


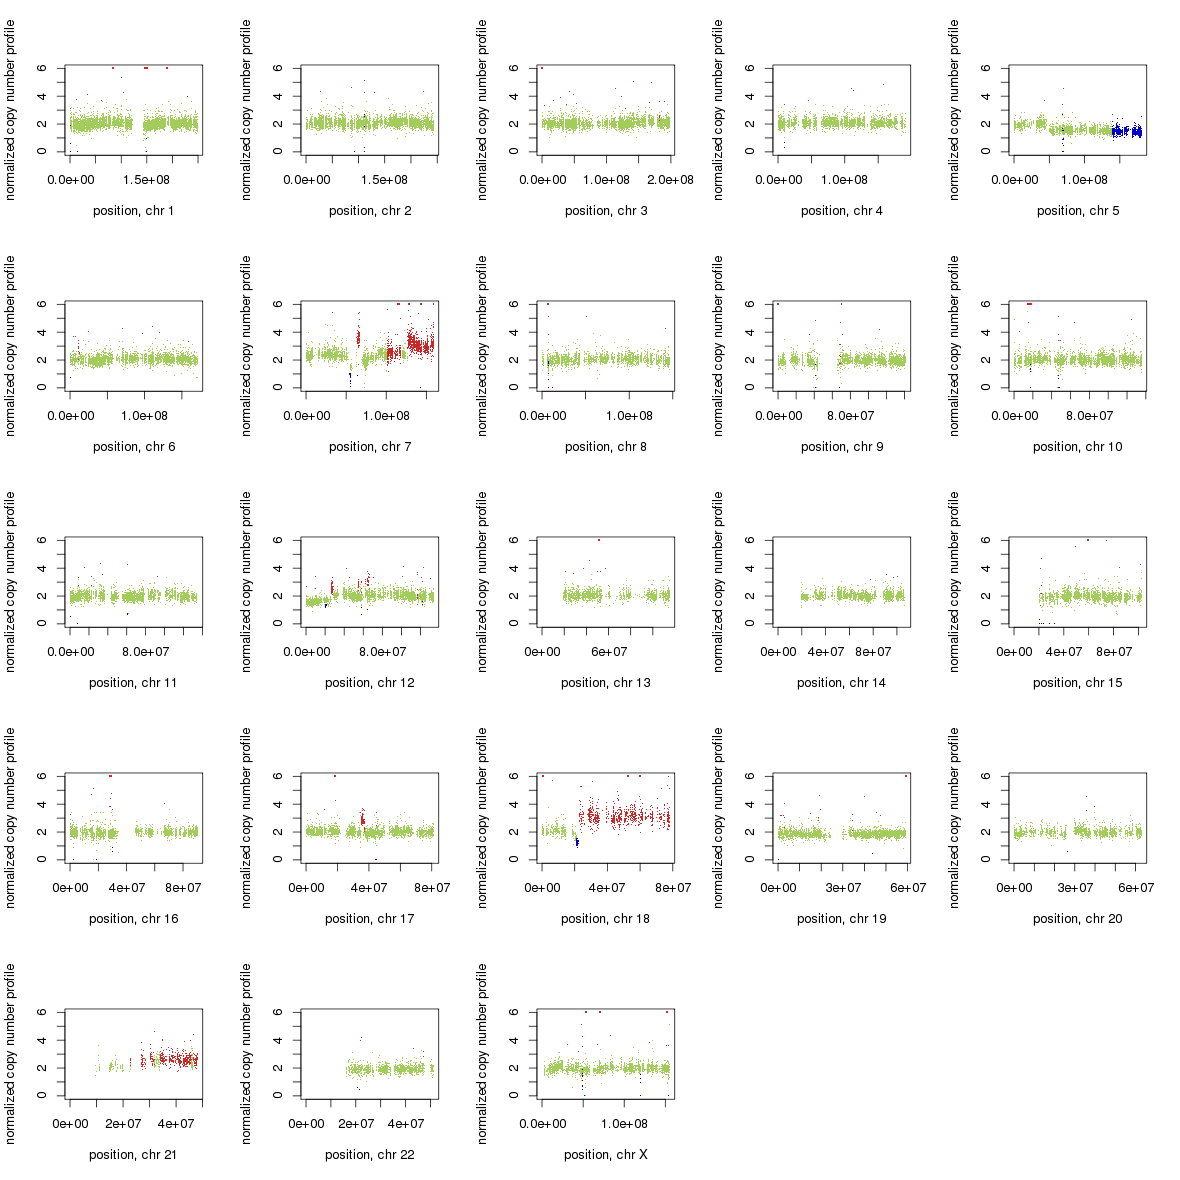


**Figure S6.** Copy number variation (CNV) changes in HCC827/R1 compared to HCC827. Red: CNV gain; blue: CNV loss; green: no change.


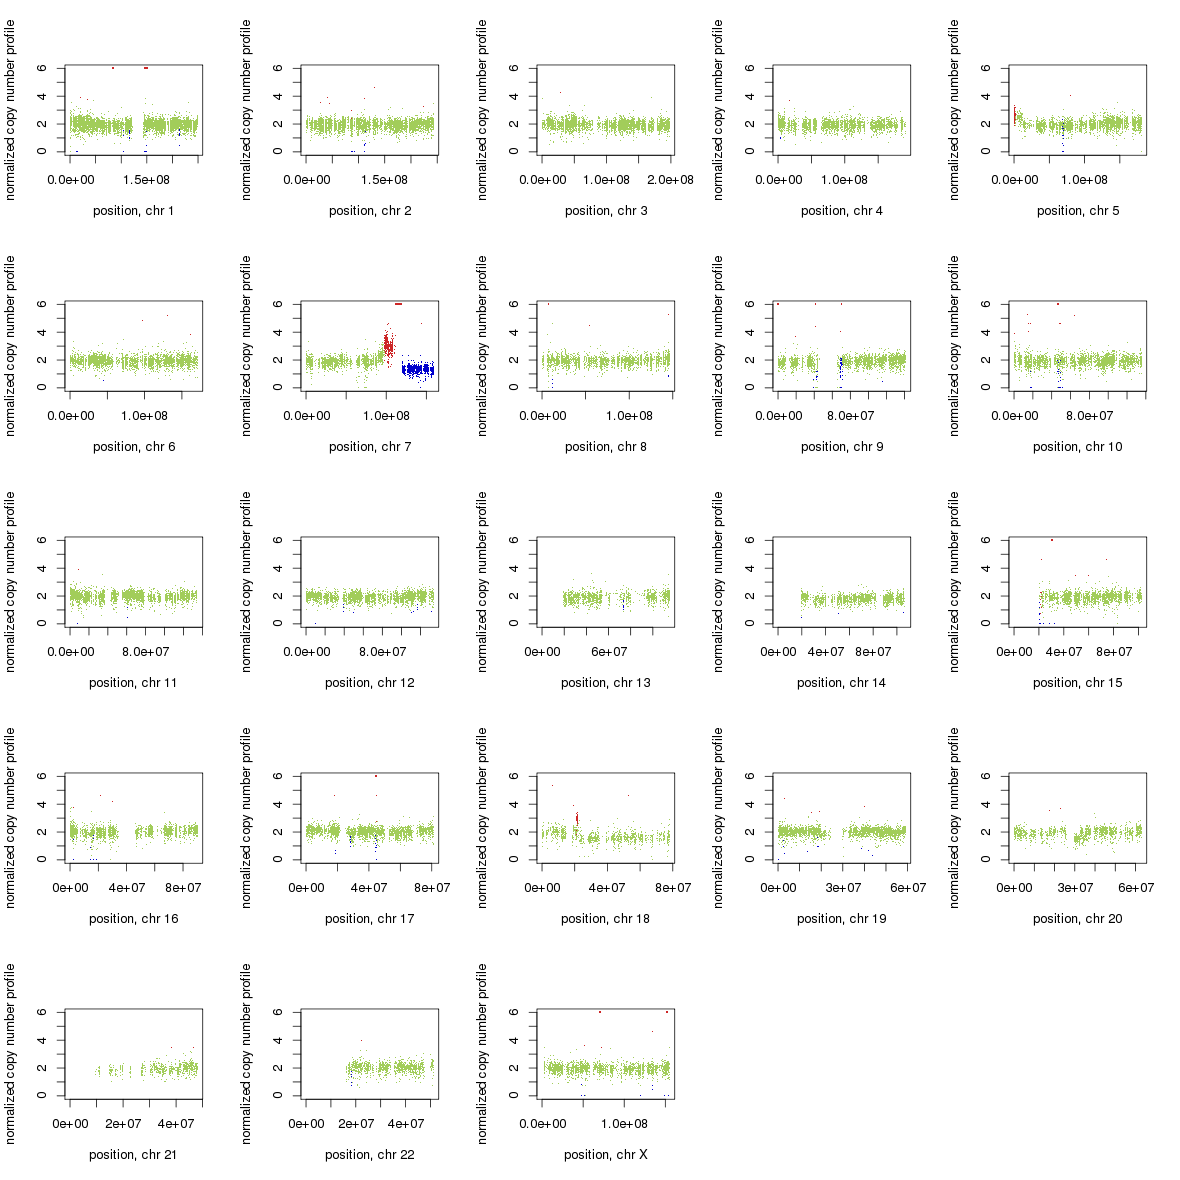


**Figure S7.** Copy number variation (CNV) changes in HCC827/R2 compared to HCC827. Red: CNV gain; blue: CNV loss; green: no change.


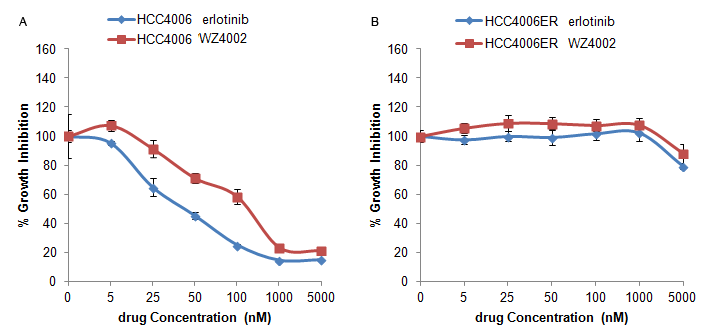


**Figure S8.** Effect of erlotinib and WZ4002 (T790M-specific small molecule) on the growth of HCC4006 (A) and HCC4006/ER (B) cells.


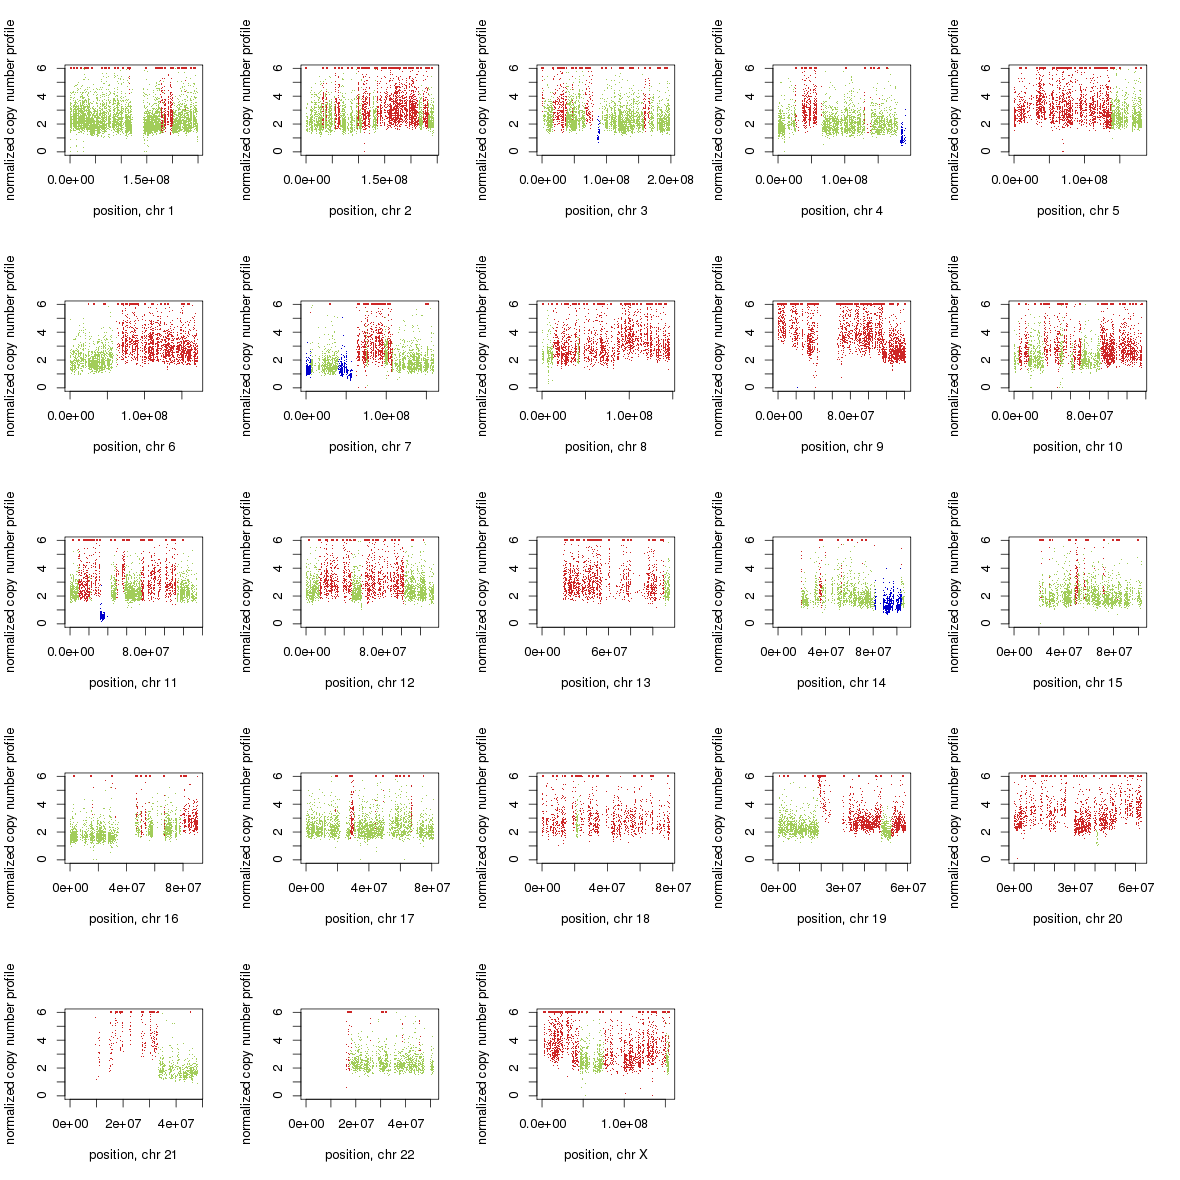


**Figure S9.** Copy number variation (CNV) changes in HCC4006/ER compared to HCC4006.Red: CNV gain; blue: CNV loss; green: no change.

| (A). *EGFR* (NM_005228) in PC-9/ER, PC-9/BRc1 and HCC827/R1(validated)  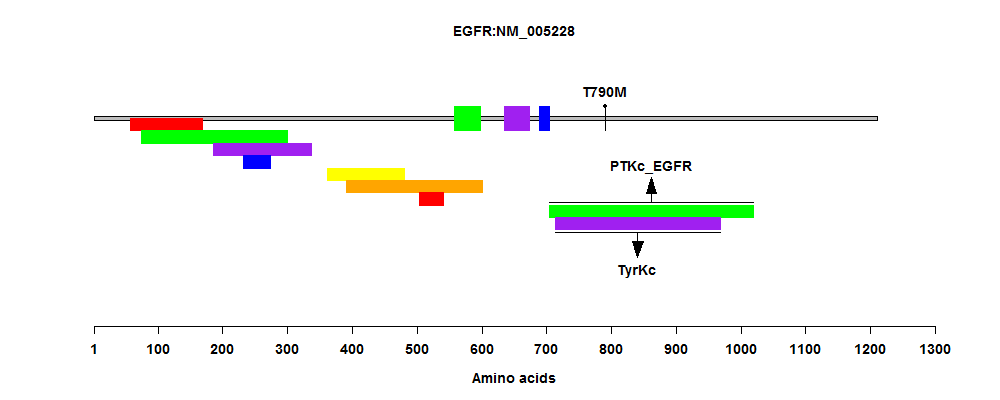 | (B). *HIPK3* (NM_005734)in HCC827/R2  (validated)  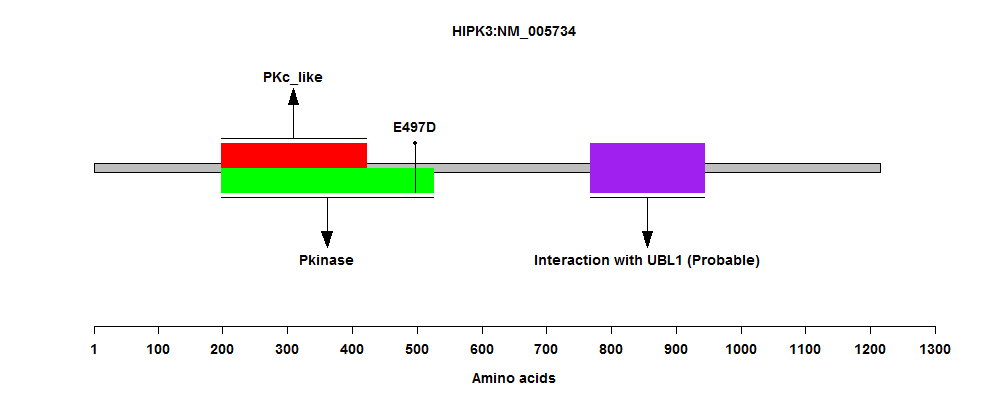 |
| --- | --- |
| (C). *MAP3K3* (NM_203351) in PC-9/S2  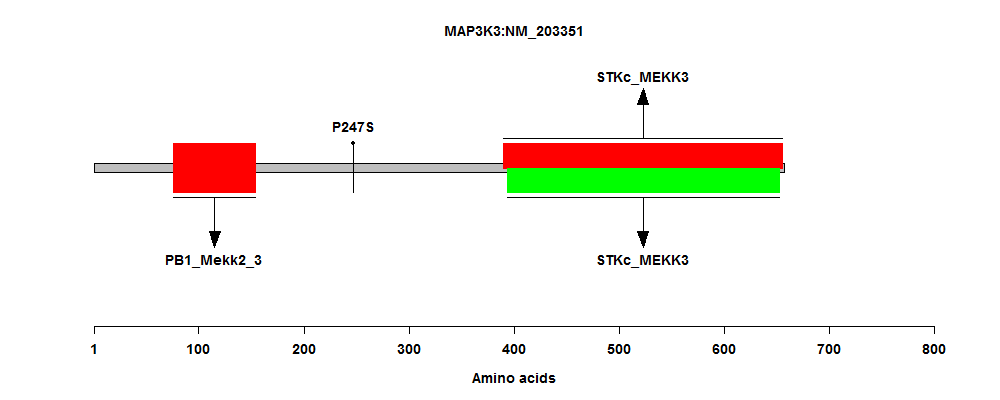 | (D). *MAP3K4* (NM_005922) in PC-9/ER  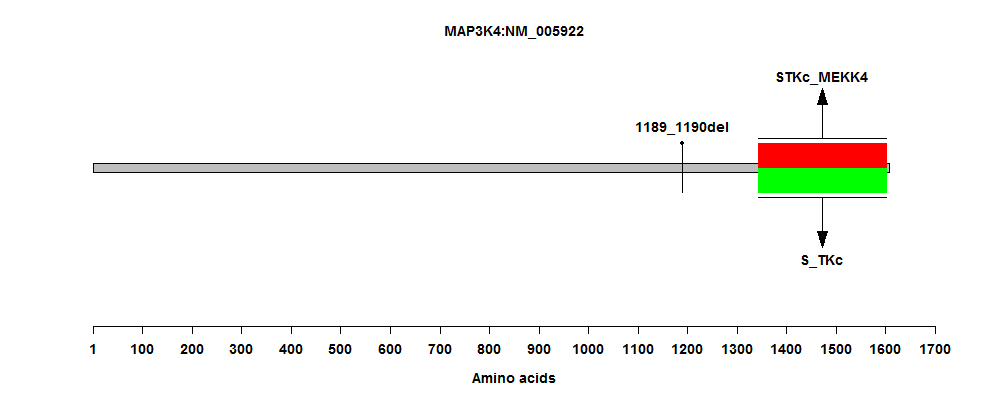 |
| (E). *TBCK* (NM_033115) in HCC827/R1  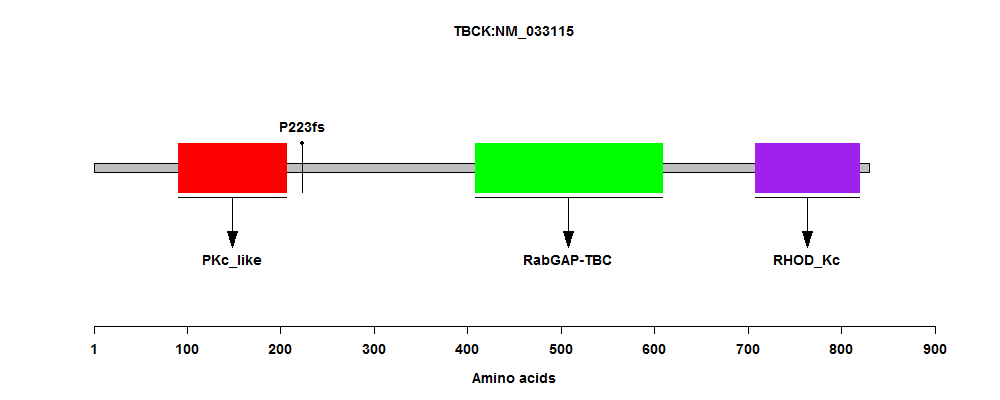 | (F). *TESK2* (NM_007170) in HCC4006 (validated)  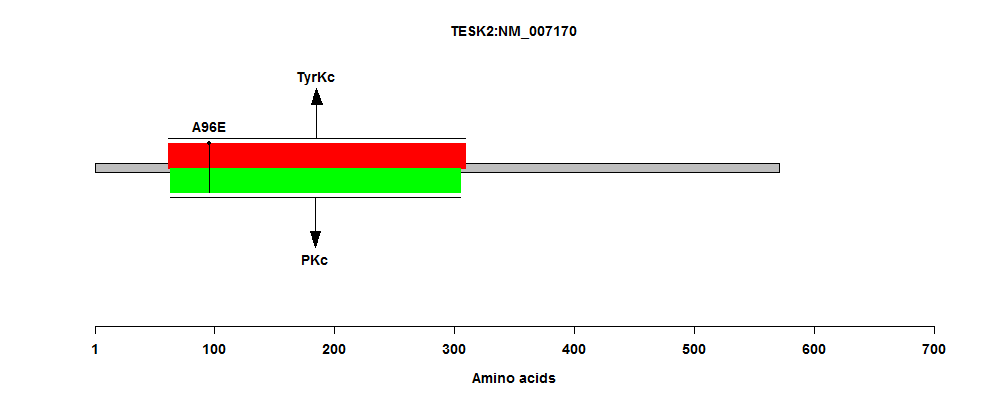 |

**Figure S10.** Illustration of location of mutations in kinase genes detected in the cell lines.
