# Supplementary material for: Next-generation sequencing of paired tyrosine kinase inhibitor-sensitive and -resistant EGFR mutant lung cancer cell lines identifies spectrum of DNA changes associated with drug resistance
Source: HighWire-hosted journal article supplement (doi:10.1101/gr.152322.112), 2013-06-03
Supplement: Supplemental_Tables.xlsx [file Supplemental_Tables.xlsx]

## Sheet: Readme
Variant_type	SNV or indel
Variant_classification	Variant classification
Gene	Functional annotation
Chr	Chromosome
Start	Start
End	End
Ref	Reference allele
Alt	Alternative allele
QUAL	Phred score of somatic p values by VarScan2
DP	Depth
LJB_SIFT_Pred	Prediction based on SIFT score: D(amaging) or T(olerated)
LJB_PolyPhen2_Pred	Prediction based on Polyphen2: "D" ("probably damaging"), "P" ("possibly damaging") or "B" ("benign")
Phosphorylation_site	The amino acid is any of the 3 key residues: serine (S), threonine (T), and tyrosine (Y)
Validation	Yes: pass validation; No: fail validation; NA: not sent for validation

## Sheet: PC-9S1
Variant_type	Variant_classification	Gene	Chr	Start	End	Ref	Alt	QUAL	DP	LJB_SIFT_Pred	LJB_PolyPhen2_Pred	Phosphorylation_site	Validation
SNV	nonsynonymous	SLC39A10:NM_001127257:exon2:c.C514T:p.H172Y,SLC39A10:NM_020342:exon2:c.C514T:p.H172Y,	chr2	196545280	196545280	C	T	69.1476	61	T	P	No	Yes
SNV	nonsynonymous	FAM186A:NM_001145475:exon4:c.T4451C:p.I1484T,	chr12	50746164	50746164	A	G	15.7624	23			No	NA
SNV	nonsynonymous	VWDE:NM_001135924:exon5:c.C731T:p.T244I,	chr7	12420170	12420170	G	A	60.8126	43			Yes	Yes
SNV	nonsynonymous	NOX4:NM_001143836:exon6:c.A458G:p.K153R,NOX4:NM_001143837:exon9:c.A386G:p.K129R,NOX4:NM_016931:exon6:c.A458G:p.K153R,	chr11	89173873	89173873	T	C	43.9384	39	T	B	No	NA
SNV	synonymous	TEKT4:NM_144705:exon4:c.G747A:p.T249T,	chr2	95540554	95540554	G	A	16.0074	25			Yes	NA
SNV	nonsynonymous	UBE3B:NM_130466:exon4:c.A209G:p.K70R,UBE3B:NM_183415:exon4:c.A209G:p.K70R,	chr12	109921713	109921713	A	G	43.6597	46	T	P	No	Yes
SNV	nonsynonymous	ADCY10:NM_018417:exon27:c.A3917T:p.K1306M,ADCY10:NM_001167749:exon24:c.A3458T:p.K1153M,	chr1	167793927	167793927	T	A	36.4874	54	D	D	No	Yes
SNV	nonsynonymous	BPTF:NM_004459:exon26:c.C8002G:p.P2668A,BPTF:NM_182641:exon24:c.C8053G:p.P2685A,	chr17	65955783	65955783	C	G	29.9272	22	T	P	No	NA
SNV	synonymous	CTTNBP2:NM_033427:exon4:c.G1653T:p.G551G,	chr7	117431597	117431597	C	A	20.2536	39			No	NA
Indel	nonframeshift deletion	LRRN2:NM_201630:exon2:c.419_421del:p.140_141del,LRRN2:NM_006338:exon3:c.419_421del:p.140_141del,	chr1	204588700	204588702	CCA	-	68.6921	56			No	NA
Indel	frameshift deletion	CUBN:NM_001081:exon45:c.6880_6889del:p.2294_2297del,	chr10	16960732	16960741	AAAATTTGGA	-	33.2609	49			Yes	Yes
Indel	nonframeshift deletion	KIAA2018:NM_001009899:exon7:c.4410_4418del:p.1470_1473del,	chr3	113376111	113376119	TGCTGCTGC	-	205.383	102			No	No
Indel	nonframeshift deletion	SLC45A3:NM_033102:exon3:c.666_701del:p.222_234del,	chr1	205632218	205632253	GCCGACAGCCCTTCTGCTGGCTCGGTGGGGCCCAGC	-	38.507	43			Yes	NA

## Sheet: PC-9ER
Variant_type	Variant_classification	Gene	Chr	Start	End	Ref	Alt	QUAL	DP	LJB_SIFT_Pred	LJB_PolyPhen2_Pred	Phosphorylation_site	Validation
Indel	nonframeshift deletion	ACACA:NM_198834:exon21:c.2644_2649del:p.882_883del,ACACA:NM_198838:exon20:c.2299_2304del:p.767_768del,ACACA:NM_198837:exon19:c.2359_2364del:p.787_788del,ACACA:NM_198839:exon25:c.2533_2538del:p.845_846del,ACACA:NM_198836:exon21:c.2533_2538del:p.845_846del,	chr17	35601597	35601602	GCCTCT	-	58.2688	72			No	Yes
SNV	nonsynonymous SNV	AFAP1L1:NM_152406:exon15:c.G1804A:p.A602T,AFAP1L1:NM_001146337:exon15:c.G1804A:p.A602T,	chr5	148702274	148702274	G	A	33.7867	44	T	B	No	Yes
SNV	nonsynonymous SNV	ANKRD20A4:NM_001098805:exon5:c.C682A:p.Q228K,	chr9	69391174	69391174	C	A	34.4921	75	T	P	No	NA
SNV	nonsynonymous SNV	AOC2:NM_009590:exon1:c.G1036C:p.V346L,AOC2:NM_001158:exon1:c.G1036C:p.V346L,	chr17	40997679	40997679	G	C	39.7916	40	T	B	No	Yes
SNV	nonsynonymous SNV	ATP8A1:NM_006095:exon19:c.G1606C:p.G536R,ATP8A1:NM_001105529:exon18:c.G1561C:p.G521R,	chr4	42551076	42551076	C	G	23.6837	48	D	P	No	Yes
SNV	nonsynonymous SNV	BIRC3:NM_182962:exon3:c.A710T:p.N237I,BIRC3:NM_001165:exon2:c.A710T:p.N237I,	chr11	102195950	102195950	A	T	52.7874	89	D	P	No	Yes
SNV	nonsynonymous SNV	C13orf40:NM_001146197:exon4:c.A3058C:p.T1020P,	chr13	103399989	103399989	T	G	53.9575	68			Yes	NA
SNV	synonymous SNV	CABP4:NM_145200:exon1:c.C198A:p.A66A,	chr11	67223092	67223092	C	A	19.585	32			No	NA
SNV	nonsynonymous SNV	CPNE8:NM_153634:exon8:c.C519A:p.D173E,	chr12	39161493	39161493	G	T	48.2006	38	D	P	No	Yes
Indel	nonframeshift deletion	DSPP:NM_014208:exon5:c.3484_3492del:p.1162_1164del,	chr4	88537298	88537306	AGCAGCGAT	-	25.155	27			Yes	NA
SNV	nonsynonymous SNV	EGFR:NM_005228:exon20:c.C2369T:p.T790M,	chr7	55249071	55249071	C	T	102.725	219	D	D	Yes	Yes
SNV	synonymous SNV	ETAA1:NM_019002:exon5:c.T2346C:p.H782H,	chr2	67632160	67632160	T	C	39.1094	77			No	NA
Indel	frameshift deletion	FAM122C:NM_001170780:exon4:c.91delT:p.L31fs,	chrX	133941611	133941611	T	-	63.2248	76			No	Yes
SNV	stopgain SNV	GNPTG:NM_032520:exon8:c.G592T:p.E198X,	chr16	1412518	1412518	G	T	39.6869	30	NA	NA	No	Yes
SNV	nonsynonymous SNV	GPR61:NM_031936:exon2:c.C283T:p.P95S,	chr1	110085927	110085927	C	T	35.9843	16	D	D	No	Yes
SNV	synonymous SNV	GPR89A:NM_001097613:exon13:c.G1005C:p.L335L,GPR89A:NM_001097612:exon12:c.G1080C:p.L360L,	chr1	145769423	145769423	C	G	62.8117	58			No	NA
SNV	nonsynonymous SNV	HIST1H4B:NM_003544:exon1:c.G256A:p.D86N,	chr6	26027225	26027225	C	T	47.4597	52	NA	NA	No	NA
Indel	nonframeshift deletion	INTS1:NM_001080453:exon18:c.2312_2317del:p.771_773del,	chr7	1528981	1528986	TGGTCA	-	41.0888	39			Yes	NA
SNV	stopgain SNV	KIF17:NM_020816:exon12:c.C2509T:p.Q837X,KIF17:NM_001122819:exon12:c.C2509T:p.Q837X,	chr1	20998644	20998644	G	A	41.3446	29	NA	NA	No	Yes
SNV	synonymous SNV	KLK4:NM_004917:exon4:c.C579T:p.A193A,	chr19	51411648	51411648	G	A	30.7209	60			No	NA
Indel	nonframeshift deletion	KRT4:NM_002272:exon1:c.460_462del:p.154_154del,	chr12	53207603	53207605	AAA	-	31.803	53			No	NA
SNV	stopgain SNV	LIN7C:NM_018362:exon1:c.G16T:p.E6X,	chr11	27528284	27528284	C	A	17.177	30	NA	NA	No	Yes
Indel	nonframeshift deletion	LRCH2:NM_020871:exon12:c.1490_1492del:p.497_498del,	chrX	114391202	114391204	TCA	-	33.3451	43			No	Yes
Indel	nonframeshift deletion	MAP3K4:NM_005922:exon17:c.3566_3568del:p.1189_1190del,	chr6	161519351	161519353	CTG	-	53.908	34			No	No
SNV	synonymous SNV	NFKBIE:NM_004556:exon1:c.C756A:p.L252L,	chr6	44232745	44232745	G	T	31.428	42			No	NA
SNV	nonsynonymous SNV	OR4Q3:NM_172194:exon1:c.G251A:p.G84E,	chr14	20215837	20215837	G	A	46.409	59	T	B	No	NA
SNV	nonsynonymous SNV	PDILT:NM_174924:exon4:c.G441C:p.W147C,	chr16	20387492	20387492	C	G	57.997	47	D	D	No	Yes
SNV	nonsynonymous SNV	PKP4:NM_001005476:exon6:c.G481C:p.G161R,PKP4:NM_003628:exon6:c.G481C:p.G161R,	chr2	159477811	159477811	G	C	35.155	22	D	B	No	Yes
SNV	synonymous SNV	PREX1:NM_020820:exon35:c.G4419A:p.E1473E,	chr20	47248922	47248922	C	T	49.0087	59			No	NA
Indel	nonframeshift deletion	QRICH2:NM_032134:exon4:c.1888_1917del:p.630_639del,	chr17	74288393	74288422	ACCAGGTTGCACCAAACCACGCTGAACTAT	-	134.174	80			No	NA
SNV	synonymous SNV	RADIL:NM_018059:exon14:c.G2988A:p.T996T,	chr7	4839395	4839395	C	T	36.3905	21			Yes	NA
SNV	nonsynonymous SNV	RFPL3:NM_006604:exon3:c.C364T:p.L122F,RFPL3:NM_001098535:exon2:c.C451T:p.L151F,	chr22	32756316	32756316	C	T	38.3955	37	NA	NA	No	NA
SNV	nonsynonymous SNV	RFPL3:NM_006604:exon3:c.T365G:p.L122R,RFPL3:NM_001098535:exon2:c.T452G:p.L151R,	chr22	32756317	32756317	T	G	38.3191	38	NA	B	No	NA
SNV	nonsynonymous SNV	SF1:NM_201997:exon10:c.C1222T:p.H408Y,SF1:NM_201998:exon10:c.C1222T:p.H408Y,SF1:NM_201995:exon10:c.C1222T:p.H408Y,SF1:NM_001178030:exon10:c.C1597T:p.H533Y,SF1:NM_001178031:exon10:c.C1144T:p.H382Y,SF1:NM_004630:exon10:c.C1222T:p.H408Y,	chr11	64535163	64535163	G	A	28.7553	37	D	NA	No	Yes
SNV	synonymous SNV	SMARCC2:NM_001130420:exon30:c.G3432A:p.T1144T,SMARCC2:NM_003075:exon28:c.G3618A:p.T1206T,SMARCC2:NM_139067:exon29:c.G3366A:p.T1122T,	chr12	56557500	56557500	C	T	30.6769	32			Yes	NA
SNV	synonymous SNV	SPRED2:NM_181784:exon2:c.C153T:p.G51G,SPRED2:NM_001128210:exon2:c.C144T:p.G48G,	chr2	65571904	65571904	G	A	60.2946	66			No	NA
SNV	nonsynonymous SNV	SRGAP3:NM_001033117:exon21:c.C2610A:p.S870R,SRGAP3:NM_014850:exon21:c.C2682A:p.S894R,	chr3	9032400	9032400	G	T	55.2675	17	T	B	Yes	Yes
Indel	nonframeshift deletion	TBC1D8B:NM_017752:exon6:c.862_882del:p.288_294del,TBC1D8B:NM_198881:exon6:c.862_882del:p.288_294del,	chrX	106069294	106069314	AATGCCTTTTTTAGGCTGCCC	-	57.6664	58			No	Yes
SNV	synonymous SNV	TIMM8A:NM_001145951:exon2:c.C144T:p.A48A,	chrX	100603378	100603378	G	A	36.7946	16			No	NA
SNV	synonymous SNV	ZC3H12C:NM_033390:exon6:c.C1293T:p.Y431Y,	chr11	110035103	110035103	C	T	67.6631	48			Yes	NA
Indel	nonframeshift deletion	ZNF385B:NM_001113398:exon3:c.159_161del:p.53_54del,ZNF385B:NM_152520:exon5:c.465_467del:p.155_156del,ZNF385B:NM_001113397:exon3:c.237_239del:p.79_80del,	chr2	180383295	180383297	ACT	-	77.0792	111			No	Yes
SNV	nonsynonymous SNV	ZNF445:NM_181489:exon8:c.G1630A:p.D544N,	chr3	44489533	44489533	C	T	51.7755	33	T	B	No	Yes
Indel	frameshift insertion	ZNF793:NM_001013659:exon8:c.855_856insT:p.C285fs,	chr19	38028415	38028415	-	T	35.1436	63			No	Yes
SNV	nonsynonymous SNV	ZNF92:NM_152626:exon4:c.C463T:p.H155Y,ZNF92:NM_007139:exon3:c.C256T:p.H86Y,	chr7	64863490	64863490	C	T	61.4084	137	T	D	No	NA

## Sheet: PC-9S2
Variant_type	Variant_classification	Gene	Chr	Start	End	Ref	Alt	QUAL	DP	LJB_SIFT_Pred	LJB_PolyPhen2_Pred	Phosphorylation_site	Validation
SNV	nonsynonymous SNV	GALC:NM_001201401:exon3:c.C266T:p.T89I,GALC:NM_001037525:exon4:c.C335T:p.T112I,GALC:NM_001201402:exon4:c.C257T:p.T86I,GALC:NM_000153:exon4:c.C335T:p.T112I,	chr14	88452940	88452940	G	A	252.134	349	NA	NA	Yes	NA
SNV	nonsynonymous SNV	PSMB3:NM_002795:exon4:c.C347G:p.T116S,	chr17	36916734	36916734	C	G	259.326	282	T	B	Yes	NA
SNV	nonsynonymous SNV	SPEN:NM_015001:exon11:c.G7158C:p.Q2386H,	chr1	16259893	16259893	G	C	362.86	316	T	P	No	Yes
SNV	nonsynonymous SNV	OR2A25:NM_001004488:exon1:c.G613A:p.V205M,	chr7	143771925	143771925	G	A	376.485	475	NA	NA	No	NA
SNV	nonsynonymous SNV	PKP3:NM_007183:exon7:c.C1468G:p.Q490E,	chr11	400353	400353	C	G	44.5133	54	T	D	No	NA
SNV	nonsynonymous SNV	UPK3A:NM_006953:exon4:c.C535G:p.Q179E,	chr22	45684988	45684988	C	G	190.403	99	T	B	No	NA
SNV	nonsynonymous SNV	TMX3:NM_019022:exon1:c.G17T:p.S6I,	chr18	66382202	66382202	C	A	37.8344	54	T	B	Yes	NA
SNV	nonsynonymous SNV	NPR1:NM_000906:exon8:c.A1538G:p.E513G,	chr1	153657493	153657493	A	G	75.3519	83	D	D	No	NA
SNV	nonsynonymous SNV	FRYL:NM_015030:exon22:c.C2235G:p.F745L,	chr4	48582906	48582906	G	C	195.616	346	NA	NA	No	NA
SNV	nonsynonymous SNV	SLCO6A1:NM_173488:exon5:c.T932C:p.L311P,	chr5	101795449	101795449	A	G	325.172	426	NA	P	No	NA
SNV	nonsynonymous SNV	AHNAK2:NM_138420:exon7:c.T11366G:p.L3789R,	chr14	105410422	105410422	A	C	151.996	182			No	NA
SNV	nonsynonymous SNV	ZNF646:NM_014699:exon2:c.C3283T:p.R1095C,	chr16	31090928	31090928	C	T	19.1085	35	D	D	No	NA
SNV	nonsynonymous SNV	ZNF391:NM_001076781:exon3:c.G17A:p.G6E,	chr6	27368166	27368166	G	A	131.447	159	NA	P	No	NA
SNV	nonsynonymous SNV	KIAA1984:NM_001039374:exon10:c.T1001G:p.L334R,	chr9	139700582	139700582	T	G	139.006	198	T	P	No	NA
SNV	nonsynonymous SNV	MAP3K3:NM_002401:exon8:c.C646T:p.P216S,MAP3K3:NM_203351:exon9:c.C739T:p.P247S,	chr17	61762886	61762886	C	T	141.329	250	D	D	No	NA
SNV	nonsynonymous SNV	SPEN:NM_015001:exon11:c.G5803C:p.E1935Q,	chr1	16258538	16258538	G	C	25.3016	27	T	D	No	NA
SNV	nonsynonymous SNV	HIRIP3:NM_003609:exon6:c.G1456C:p.E486Q,	chr16	30004831	30004831	C	G	56.1513	77	D	D	No	Yes
SNV	nonsynonymous SNV	TMEM232:NM_001039763:exon8:c.A891C:p.Q297H,	chr5	109954141	109954141	T	G	128.93	190			No	NA
SNV	nonsynonymous SNV	PIGT:NM_015937:exon8:c.C899T:p.P300L,PIGT:NM_001184730:exon6:c.C593T:p.P198L,PIGT:NM_001184728:exon7:c.C731T:p.P244L,PIGT:NM_001184729:exon8:c.C899T:p.P300L,	chr20	44049199	44049199	C	T	442.552	526	T	D	No	NA
SNV	nonsynonymous SNV	TRPM6:NM_001177310:exon26:c.G3787A:p.A1263T,TRPM6:NM_001177311:exon26:c.G3787A:p.A1263T,TRPM6:NM_017662:exon26:c.G3802A:p.A1268T,	chr9	77377785	77377785	C	T	160.589	265	D	B	No	NA
SNV	stopgain SNV	GRIK2:NM_021956:exon16:c.T2624G:p.L875X,	chr6	102516283	102516283	T	G	169.678	274	NA	NA	No	Yes
SNV	synonymous SNV	SFT2D3:NM_032740:exon1:c.G45A:p.G15G,	chr2	128459147	128459147	G	A	24.4268	21			No	NA
SNV	synonymous SNV	ZNF571:NM_016536:exon4:c.G1398A:p.E466E,	chr19	38055932	38055932	C	T	127.133	162			No	NA
SNV	synonymous SNV	SLC2A13:NM_052885:exon9:c.G1674T:p.L558L,	chr12	40158308	40158308	C	A	196.02	193			No	NA
SNV	synonymous SNV	DNLZ:NM_001080849:exon2:c.G285T:p.V95V,	chr9	139257524	139257524	C	A	144.917	136			No	NA
SNV	synonymous SNV	GPR68:NM_003485:exon2:c.C114T:p.A38A,GPR68:NM_001177676:exon2:c.C114T:p.A38A,	chr14	91701281	91701281	G	A	171.136	177			No	NA
SNV	synonymous SNV	MAPK12:NM_002969:exon4:c.G330A:p.P110P,	chr22	50695607	50695607	C	T	139.135	101			No	NA

## Sheet: PC-9BRc1
Variant_type	Variant_classification	Gene	Chr	Start	End	Ref	Alt	QUAL	DP	LJB_SIFT_Pred	LJB_PolyPhen2_Pred	Phosphorylation_site	Validation
Indel	frameshift deletion	TPPP:NM_007030:exon2:c.61delG:p.D21fs,	chr5	678115	678115	C	-	53.0435	34				NA
Indel	frameshift insertion	ANKRD12:NM_015208:exon9:c.3360_3361insA:p.I1120fs,ANKRD12:NM_001083625:exon8:c.3291_3292insA:p.I1097fs,	chr18	9256625	9256625	-	A	279.118	256				NA
Indek	nonframeshift deletion	LPPR3:NM_024888:exon5:c.581_589del:p.194_197del,	chr19	814896	814904	GGATGGCGT	-	179.873	129				NA
SNV	nonsynonymous SNV	SAG:NM_000541:exon8:c.G524A:p.R175Q,	chr2	234237135	234237135	G	A	206.514	224			No	NA
SNV	nonsynonymous SNV	TRIP4:NM_016213:exon3:c.G340A:p.E114K,	chr15	64687665	64687665	G	A	148.251	223	T	D	No	NA
SNV	nonsynonymous SNV	TLE3:NM_020908:exon13:c.G1199A:p.R400Q,TLE3:NM_001105192:exon13:c.G1226A:p.R409Q,TLE3:NM_005078:exon13:c.G1235A:p.R412Q,	chr15	70349823	70349823	C	T	157.02	91			No	NA
SNV	nonsynonymous SNV	ZNF431:NM_133473:exon4:c.G310A:p.E104K,	chr19	21350460	21350460	G	A	345.715	438	T	B	No	NA
SNV	nonsynonymous SNV	EGFR:NM_005228:exon20:c.C2369T:p.T790M,	chr7	55249071	55249071	C	T	301.616	355	D	D	Yes	Yes
SNV	nonsynonymous SNV	ZBTB38:NM_001080412:exon8:c.G713T:p.R238L,	chr3	141161943	141161943	G	T	171.64	252	T	B	No	NA
SNV	nonsynonymous SNV	AHI1:NM_001134831:exon25:c.C3191T:p.A1064V,AHI1:NM_001134830:exon23:c.C3191T:p.A1064V,AHI1:NM_017651:exon24:c.C3191T:p.A1064V,	chr6	135644437	135644437	G	A	346.287	108			No	Yes
SNV	nonsynonymous SNV	KRT71:NM_033448:exon7:c.C1175T:p.A392V,	chr12	52940220	52940220	G	A	139.502	92	T	B	No	NA
SNV	nonsynonymous SNV	KCNK3:NM_002246:exon2:c.G1154A:p.R385H,	chr2	26951405	26951405	G	A	21.5067	19	T	B	No	NA
SNV	nonsynonymous SNV	RYR2:NM_001035:exon13:c.A1010G:p.K337R,	chr1	237604623	237604623	A	G	508.445	538			No	NA
SNV	nonsynonymous SNV	CAMK2N2:NM_033259:exon1:c.T107G:p.F36C,	chr3	183978967	183978967	A	C	126.334	118	D	D	No	NA
SNV	nonsynonymous SNV	RPUSD4:NM_032795:exon4:c.G582T:p.M194I,RPUSD4:NM_001144827:exon4:c.G582T:p.M194I,	chr11	126075652	126075652	C	A	88.0921	82	T	B	No	NA
SNV	nonsynonymous SNV	UTRN:NM_007124:exon39:c.A5705T:p.D1902V,	chr6	144843279	144843279	A	T	105.123	105	D	P	No	NA
SNV	nonsynonymous SNV	TTC17:NM_018259:exon5:c.C562T:p.P188S,	chr11	43413401	43413401	C	T	269.164	273	T	D	No	NA
SNV	nonsynonymous SNV	AMPH:NM_001635:exon17:c.T1355A:p.L452H,	chr7	38457468	38457468	A	T	235.723	275	T	B	No	NA
SNV	nonsynonymous SNV	INSL6:NM_007179:exon2:c.G386T:p.R129I,	chr9	5164169	5164169	C	A	137.747	64	D	D	No	NA
SNV	nonsynonymous SNV	TRAF2:NM_021138:exon8:c.G960T:p.K320N,	chr9	139814967	139814967	G	T	28.4717	39	D	D	No	NA
SNV	nonsynonymous SNV	SLC15A2:NM_001145998:exon14:c.A1214G:p.N405S,SLC15A2:NM_021082:exon15:c.A1307G:p.N436S,	chr3	121647368	121647368	A	G	732.297	622	T	B	No	NA
SNV	nonsynonymous SNV	RASGRF1:NM_153815:exon8:c.C781A:p.Q261K,RASGRF1:NM_002891:exon22:c.C3133A:p.Q1045K,RASGRF1:NM_001145648:exon21:c.C3085A:p.Q1029K,	chr15	79284079	79284079	G	T	262.024	158	D	NA	No	NA
SNV	nonsynonymous SNV	CDH24:NM_144985:exon3:c.G217A:p.D73N,CDH24:NM_022478:exon3:c.G217A:p.D73N,	chr14	23524547	23524547	C	T	168.85	133	D	P	No	Yes
SNV	nonsynonymous SNV	GLA:NM_000169:exon7:c.T1215A:p.S405R,	chrX	100652872	100652872	A	T	196.485	108	D	B	Yes	NA
SNV	nonsynonymous SNV	ATRX:NM_000489:exon20:c.C5170A:p.L1724I,ATRX:NM_138270:exon19:c.C5056A:p.L1686I,	chrX	76875965	76875965	G	T	255.624	180	T	D	No	Yes
SNV	nonsynonymous SNV	PRDM8:NM_001099403:exon4:c.G1859C:p.C620S,PRDM8:NM_020226:exon10:c.G1859C:p.C620S,	chr4	81124475	81124475	G	C	48.6973	37	T	D	No	NA
SNV	nonsynonymous SNV	KIAA1107:NM_015237:exon5:c.G510C:p.K170N,	chr1	92642574	92642574	G	C	271.332	308			No	NA
SNV	nonsynonymous SNV	MAGI2:NM_012301:exon10:c.C1732A:p.L578I,	chr7	77885575	77885575	G	T	218.118	203	T	P	No	NA
SNV	nonsynonymous SNV	PPP6R2:NM_014678:exon21:c.G2323T:p.V775L,	chr22	50879280	50879280	G	T	162.805	80	T	P	No	NA
SNV	nonsynonymous SNV	NTNG1:NM_014917:exon3:c.A593C:p.Q198P,NTNG1:NM_001113226:exon3:c.A593C:p.Q198P,NTNG1:NM_001113228:exon3:c.A593C:p.Q198P,	chr1	107867250	107867250	A	C	217.323	267	T	D	No	NA
SNV	nonsynonymous SNV	MIPEP:NM_005932:exon14:c.C1623G:p.N541K,	chr13	24410409	24410409	G	C	270.668	230	T	B	No	NA
SNV	nonsynonymous SNV	MLL2:NM_003482:exon31:c.C7156T:p.R2386W,	chr12	49434397	49434397	G	A	53.484	53			No	Yes
SNV	nonsynonymous SNV	PCNX:NM_014982:exon36:c.G7018A:p.E2340K,	chr14	71576644	71576644	G	A	512.162	322	D	D	No	NA
SNV	nonsynonymous SNV	EMID1:NM_133455:exon15:c.G1244A:p.G415D,	chr22	29654845	29654845	G	A	57.4744	67	NA	B	No	NA
SNV	nonsynonymous SNV	CTTN:NM_138565:exon10:c.C754T:p.H252Y,CTTN:NM_005231:exon10:c.C754T:p.H252Y,CTTN:NM_001184740:exon10:c.C754T:p.H252Y,	chr11	70266580	70266580	C	T	314.616	447	T	B	No	NA
SNV	nonsynonymous SNV	RHOH:NM_004310:exon3:c.G181A:p.G61S,	chr4	40245187	40245187	G	A	185.479	256	D	D	No	NA
SNV	nonsynonymous SNV	PEX19:NM_001193644:exon5:c.A566G:p.Y189C,PEX19:NM_002857:exon5:c.A566G:p.Y189C,	chr1	160251857	160251857	T	C	263.929	237	D	D	Yes	NA
SNV	nonsynonymous SNV	PDRG1:NM_030815:exon5:c.A344C:p.N115T,	chr20	30533668	30533668	T	G	390.264	218	T	B	No	NA
SNV	nonsynonymous SNV	AHRR:NM_020731:exon6:c.C562A:p.Q188K,	chr5	422952	422952	C	A	219.87	139	NA	D	No	NA
SNV	nonsynonymous SNV	OR4C12:NM_001005270:exon1:c.C776T:p.S259L,	chr11	50003262	50003262	G	A	303.61	370	D	B	Yes	NA
SNV	nonsynonymous SNV	LRP1B:NM_018557:exon62:c.G9845T:p.G3282V,	chr2	141214142	141214142	C	A	383.43	323	D	D	No	Yes
SNV	nonsynonymous SNV	FLNC:NM_001458:exon31:c.C5243T:p.P1748L,	chr7	128490073	128490073	C	T	37.0191	53	T	B	No	NA
SNV	nonsynonymous SNV	HIRA:NM_003325:exon20:c.G2397T:p.W799C,	chr22	19343811	19343811	C	A	401.627	183	D	D	No	Yes
SNV	nonsynonymous SNV	RFX6:NM_173560:exon11:c.A1115T:p.K372I,	chr6	117240392	117240392	A	T	168.512	140	D	D	No	Yes
SNV	nonsynonymous SNV	SAMD9:NM_017654:exon3:c.A2893G:p.T965A,SAMD9:NM_001193307:exon2:c.A2893G:p.T965A,	chr7	92732518	92732518	T	C	283.859	490	T	D	Yes	NA
SNV	nonsynonymous SNV	COG8:NM_032382:exon1:c.A358C:p.S120R,	chr16	69373098	69373098	T	G	26.4392	28	T	B	Yes	NA
SNV	nonsynonymous SNV	CD207:NM_015717:exon6:c.C857T:p.P286L,	chr2	71058311	71058311	G	A	420.138	390			No	NA
SNV	nonsynonymous SNV	NEB:NM_001164507:exon27:c.T2542A:p.Y848N,NEB:NM_001164508:exon27:c.T2542A:p.Y848N,NEB:NM_004543:exon27:c.T2542A:p.Y848N,	chr2	152544028	152544028	A	T	301.433	340			Yes	NA
SNV	nonsynonymous SNV	ARHGEF37:NM_001001669:exon6:c.G738C:p.K246N,	chr5	148997818	148997818	G	C	127.919	166	NA	D	No	NA
SNV	nonsynonymous SNV	DOCK7:NM_033407:exon12:c.A1412T:p.N471I,	chr1	63090943	63090943	T	A	201.458	282	D	P	No	NA
SNV	nonsynonymous SNV	ARSH:NM_001011719:exon5:c.C847A:p.R283S,	chrX	2936657	2936657	C	A	518.282	363	D	B	No	NA
SNV	nonsynonymous SNV	LLGL2:NM_001031803:exon15:c.C1837T:p.L613F,LLGL2:NM_004524:exon15:c.C1837T:p.L613F,	chr17	73566299	73566299	C	T	119.847	58	D	D	No	NA
SNV	nonsynonymous SNV	ZSWIM4:NM_023072:exon8:c.G1459A:p.A487T,	chr19	13928676	13928676	G	A	68.0144	38	T	D	No	NA
SNV	nonsynonymous SNV	OR14C36:NM_001001918:exon1:c.G327T:p.E109D,	chr1	248512403	248512403	G	T	100.717	147	D	B	No	NA
SNV	nonsynonymous SNV	PKHD1:NM_170724:exon52:c.C8183A:p.S2728Y,PKHD1:NM_138694:exon52:c.C8183A:p.S2728Y,	chr6	51695778	51695778	G	T	126.127	60	D	P	Yes	NA
SNV	nonsynonymous SNV	BCAM:NM_001013257:exon10:c.A1316T:p.N439I,BCAM:NM_005581:exon10:c.A1316T:p.N439I,	chr19	45322119	45322119	A	T	131.098	160	D	B	No	NA
SNV	nonsynonymous SNV	MYH1:NM_005963:exon27:c.C3392T:p.A1131V,	chr17	10404773	10404773	G	A	78.3244	93	D	B	No	NA
SNV	nonsynonymous SNV	SELE:NM_000450:exon4:c.C526A:p.Q176K,	chr1	169700979	169700979	G	T	225.628	225	T	P	No	NA
SNV	nonsynonymous SNV	RTKN2:NM_145307:exon7:c.G730C:p.E244Q,	chr10	63983048	63983048	C	G	530.409	349	T	D	No	NA
SNV	nonsynonymous SNV	CHERP:NM_006387:exon14:c.C2264T:p.S755L,	chr19	16631256	16631256	G	A	156.462	275	T	NA	Yes	NA
SNV	nonsynonymous SNV	ZNF814:NM_001144989:exon3:c.C1010T:p.A337V,	chr19	58385748	58385748	G	A	940.104	1042			No	NA
SNV	nonsynonymous SNV	TMPRSS15:NM_002772:exon3:c.A319G:p.K107E,	chr21	19770221	19770221	T	C	95.9592	69	T	B	No	NA
SNV	nonsynonymous SNV	PELP1:NM_014389:exon12:c.A1412C:p.D471A,	chr17	4578114	4578114	T	G	216.017	154			No	NA
SNV	nonsynonymous SNV	PCLO:NM_033026:exon5:c.T5119A:p.S1707T,PCLO:NM_014510:exon5:c.T5119A:p.S1707T,	chr7	82585150	82585150	A	T	433.044	327			Yes	NA
SNV	stopgain SNV	MPHOSPH9:NM_022782:exon1:c.G223T:p.G75X,	chr12	123706112	123706112	C	A	191.021	163	NA	NA	No	NA
SNV	stopgain SNV	DYNC1H1:NM_001376:exon22:c.G4642T:p.E1548X,	chr14	102468973	102468973	G	T	457.814	521	NA	NA	No	NA
SNV	stopgain SNV	TRDN:NM_006073:exon3:c.G355T:p.E119X,	chr6	123869635	123869635	C	A	198.191	173			No	NA
SNV	stopgain SNV	ZNF257:NM_033468:exon4:c.C436T:p.Q146X,	chr19	22270988	22270988	C	T	281.308	250			No	NA
SNV	stopgain SNV	LRP1B:NM_018557:exon39:c.C6285A:p.Y2095X,	chr2	141459727	141459727	G	T	313.479	317	NA	NA	Yes	Yes
SNV	stopgain SNV	PCDH9:NM_203487:exon2:c.C1609T:p.R537X,PCDH9:NM_020403:exon2:c.C1609T:p.R537X,	chr13	67800964	67800964	G	A	57.6086	70	NA	NA	No	Yes
SNV	stopgain SNV	LRP1B:NM_018557:exon23:c.G3685T:p.E1229X,	chr2	141660570	141660570	C	A	657.894	476	NA	NA	No	Yes
SNV	synonymous SNV	ZNF496:NM_032752:exon9:c.G1668A:p.R556R,	chr1	247463917	247463917	C	T	159.278	135			No	NA
SNV	synonymous SNV	NEXN:NM_144573:exon8:c.G762A:p.L254L,NEXN:NM_001172309:exon7:c.G570A:p.L190L,	chr1	78392475	78392475	G	A	318.63	219			No	NA
SNV	synonymous SNV	IKBKAP:NM_003640:exon31:c.A3345G:p.E1115E,	chr9	111643986	111643986	T	C	587.976	391			No	NA
SNV	synonymous SNV	TBP:NM_001172085:exon2:c.G168A:p.Q56Q,TBP:NM_003194:exon3:c.G228A:p.Q76Q,	chr6	170871052	170871052	G	A	88.1353	56			No	NA
SNV	synonymous SNV	DENND4A:NM_005848:exon32:c.G5553A:p.V1851V,DENND4A:NM_001144823:exon33:c.G5682A:p.V1894V,	chr15	65954228	65954228	C	T	640.664	348			No	NA
SNV	synonymous SNV	NOX5:NM_001184780:exon12:c.G1695A:p.L565L,NOX5:NM_024505:exon12:c.G1800A:p.L600L,NOX5:NM_001184779:exon12:c.G1716A:p.L572L,	chr15	69339860	69339860	G	A	207.839	111			No	NA
SNV	synonymous SNV	HEATR7B2:NM_173489:exon38:c.T4203C:p.D1401D,	chr5	41000927	41000927	A	G	345.224	336			No	NA
SNV	synonymous SNV	HIPK2:NM_022740:exon3:c.C1119T:p.I373I,HIPK2:NM_001113239:exon3:c.C1119T:p.I373I,	chr7	139316456	139316456	G	A	457.445	402			No	NA
SNV	synonymous SNV	PNN:NM_002687:exon1:c.G111C:p.V37V,	chr14	39644594	39644594	G	C	200.604	193			No	NA
SNV	synonymous SNV	ZNF814:NM_001144989:exon3:c.G996C:p.S332S,	chr19	58385762	58385762	C	G	488.684	714			Yes	NA
SNV	synonymous SNV	URB2:NM_014777:exon7:c.C4132T:p.L1378L,	chr1	229783482	229783482	C	T	127.098	144			No	NA
SNV	synonymous SNV	SLC5A2:NM_003041:exon10:c.C1143A:p.L381L,	chr16	31499956	31499956	C	A	34.971	33			No	NA
SNV	synonymous SNV	MLL2:NM_003482:exon39:c.C10857A:p.L3619L,	chr12	49427631	49427631	G	T	62.8798	49			No	NA
SNV	synonymous SNV	FREM2:NM_207361:exon1:c.C1053T:p.P351P,	chr13	39262534	39262534	C	T	210.354	137			No	NA
SNV	synonymous SNV	GPR133:NM_198827:exon15:c.C1563G:p.V521V,	chr12	131569100	131569100	C	G	197.839	189			No	NA
SNV	synonymous SNV	KIAA1210:NM_020721:exon1:c.G102A:p.G34G,	chrX	118284441	118284441	C	T	124.213	70			No	NA
SNV	synonymous SNV	ZNF354B:NM_058230:exon5:c.C1020G:p.S340S,	chr5	178310473	178310473	C	G	145.874	293			Yes	NA
SNV	synonymous SNV	ARSH:NM_001011719:exon5:c.G846A:p.G282G,	chrX	2936656	2936656	G	A	521.089	359			No	NA
SNV	synonymous SNV	ZNF773:NM_198542:exon4:c.T309G:p.A103A,	chr19	58017772	58017772	T	G	247.409	366			No	NA
SNV	synonymous SNV	KIF1C:NM_006612:exon4:c.C138G:p.A46A,	chr17	4904098	4904098	C	G	464.134	485			No	NA

## Sheet: HCC827S-R1
Variant_type	Variant_classification	Gene	Chr	Start	End	Ref	Alt	QUAL	DP	LJB_SIFT_Pred	LJB_PolyPhen2_Pred	Phosphorylation_site	Validation
SNV	synonymous	KIF3A:NM_007054:exon11:c.G1512A:p.L504L,	chr5	132038631	132038631	C	T	182.908	380			No	NA
SNV	synonymous	RNF180:NM_178532:exon4:c.C657T:p.C219C,RNF180:NM_001113561:exon4:c.C657T:p.C219C,	chr5	63509810	63509810	C	T	83.5182	132			No	NA
SNV	nonsynonymous	THRSP:NM_003251:exon1:c.T251G:p.V84G,	chr11	77775178	77775178	T	G	20.3115	28	T	D	No	NA
SNV	nonsynonymous	TRIM36:NM_001017397:exon2:c.C128T:p.T43I,	chr5	114506855	114506855	G	A	67.2023	122	NA	NA	Yes	Yes
SNV	synonymous	CCNJL:NM_024565:exon7:c.C1275T:p.S425S,	chr5	159680418	159680418	G	A	15.2738	42			Yes	NA
SNV	nonsynonymous	HARS2:NM_012208:exon5:c.A508G:p.R170G,	chr5	140075201	140075201	A	G	80.5215	193	D	D	No	Yes
SNV	nonsynonymous	PPARGC1B:NM_001172698:exon9:c.G2617T:p.D873Y,PPARGC1B:NM_001172699:exon9:c.G2542T:p.D848Y,PPARGC1B:NM_133263:exon10:c.G2734T:p.D912Y,	chr5	149221858	149221858	G	T	45.828	91	D	D	No	Yes
SNV	nonsynonymous	SPZ1:NM_032567:exon1:c.C539A:p.A180D,	chr5	79616573	79616573	C	A	176.142	290	NA	NA	No	Yes

## Sheet: HCC827S-R2
Variant_type	Variant_classification	Gene	Chr	Start	End	Ref	Alt	QUAL	DP	LJB_SIFT_Pred	LJB_PolyPhen2_Pred	Phosphorylation_site	Validation
SNV	nonsynonymous SNV	B4GALT2:NM_001005417:exon4:c.A699C:p.Q233H,B4GALT2:NM_003780:exon4:c.A699C:p.Q233H,	chr1	44450686	44450686	A	C	24.9648	53	T	D	No	NA

## Sheet: HCC827R1
Variant_type	Variant_classification	Gene	Chr	Start	End	Ref	Alt	QUAL	DP	LJB_SIFT_Pred	LJB_PolyPhen2_Pred	Phosphorylation_site	Validation
Indel	frameshift deletion	B3GNT5:NM_032047:exon2:c.45delA:p.L15fs,	chr3	182987631	182987631	A	-	299.084	527			No	No
Indel	frameshift insertion	TBCK:NM_001163437:exon10:c.740_741insC:p.P247fs,TBCK:NM_033115:exon8:c.668_669insC:p.P223fs,TBCK:NM_001163436:exon10:c.857_858insC:p.P286fs,TBCK:NM_001163435:exon10:c.857_858insC:p.P286fs,	chr4	107168370	107168370	-	G	114.115	300			No	NA
SNV	nonsynonymous SNV	TTC13:NM_024525:exon10:c.G992A:p.G331D,TTC13:NM_001122835:exon8:c.G833A:p.G278D,	chr1	231067615	231067615	C	T	61.6496	159	D	D	No	Yes
SNV	nonsynonymous SNV	TNPO3:NM_012470:exon12:c.C1653A:p.F551L,	chr7	128626820	128626820	G	T	128.59	127	T	P	No	No
SNV	nonsynonymous SNV	GPR142:NM_181790:exon3:c.G361A:p.G121S,	chr17	72366662	72366662	G	A	17.9911	23	T	B	No	No
SNV	nonsynonymous SNV	CPEB2:NM_182485:exon3:c.A1961G:p.Q654R,CPEB2:NM_001177382:exon3:c.A1961G:p.Q654R,	chr4	15009978	15009978	A	G	67.0818	104	D	P	No	Yes
SNV	nonsynonymous SNV	IFNE:NM_176891:exon1:c.G482A:p.S161N,	chr9	21481212	21481212	C	T	304.353	305	D	D	Yes	NA
SNV	nonsynonymous SNV	RPAP1:NM_015540:exon22:c.C3733T:p.R1245C,	chr15	41812651	41812651	G	A	16.1264	25	D	D	No	No
SNV	nonsynonymous SNV	VPS13C:NM_017684:exon78:c.A10594C:p.S3532R,VPS13C:NM_001018088:exon80:c.A10723C:p.S3575R,VPS13C:NM_018080:exon78:c.A10594C:p.S3532R,VPS13C:NM_020821:exon80:c.A10723C:p.S3575R,	chr15	62161724	62161724	T	G	204.755	168	D	D	Yes	No
SNV	nonsynonymous SNV	C1orf87:NM_152377:exon9:c.A1135T:p.N379Y,	chr1	60476121	60476121	T	A	136.294	195	D	P	No	Yes
SNV	nonsynonymous SNV	LRP1B:NM_018557:exon78:c.G11959A:p.D3987N,	chr2	141093341	141093341	C	T	243.517	313	T	D	No	Yes
SNV	nonsynonymous SNV	NOS3:NM_001160110:exon3:c.A404G:p.Y135C,NOS3:NM_000603:exon4:c.A404G:p.Y135C,NOS3:NM_001160109:exon3:c.A404G:p.Y135C,NOS3:NM_001160111:exon3:c.A404G:p.Y135C,	chr7	150693625	150693625	A	G	49.3049	52	D	D	Yes	Yes
SNV	nonsynonymous SNV	ADCY5:NM_183357:exon8:c.G1977A:p.M659I,ADCY5:NM_001199642:exon8:c.G927A:p.M309I,	chr3	123044280	123044280	C	T	13.1528	30	T	D	No	Yes
SNV	nonsynonymous SNV	MYH1:NM_005963:exon16:c.G1704T:p.K568N,	chr17	10411873	10411873	C	A	129.487	202	D	P	No	Yes
SNV	stopgain SNV	TLR2:NM_003264:exon3:c.G1872A:p.W624X,	chr4	154625931	154625931	G	A	101.794	106			No	Yes
SNV	synonymous SNV	TRIM33:NM_015906:exon16:c.T2802C:p.I934I,TRIM33:NM_033020:exon16:c.T2802C:p.I934I,	chr1	114945472	114945472	A	G	109.434	195			No	NA
SNV	synonymous SNV	LIN28A:NM_024674:exon4:c.G615A:p.P205P,	chr1	26752934	26752934	G	A	113.294	79			No	NA
SNV	synonymous SNV	CYP1A2:NM_000761:exon5:c.C1125T:p.T375T,	chr15	75044547	75044547	C	T	192.186	150			No	NA

## Sheet: HCC827R2
Variant_type	Variant_classification	Gene	Chr	Start	End	Ref	Alt	QUAL	DP	LJB_SIFT_Pred	LJB_PolyPhen2_Pred	Phosphorylation_site	Validation
Indel	frameshift insertion	KCND3:NM_172198:exon2:c.904_905insC:p.R302fs,KCND3:NM_004980:exon2:c.904_905insC:p.R302fs,	chr1	112524445	112524445	-	G	38.6082	109				NA
SNV	nonsynonymous SNV	ATRNL1:NM_207303:exon13:c.C2039A:p.T680K,	chr10	117027860	117027860	C	A	202.687	125	D	D	Yes	NA
SNV	nonsynonymous SNV	HIPK3:NM_005734:exon6:c.A1491T:p.E497D,HIPK3:NM_001048200:exon6:c.A1491T:p.E497D,	chr11	33360958	33360958	A	T	373.892	211	D	P	No	Yes
SNV	nonsynonymous SNV	OR8B3:NM_001005467:exon1:c.G148T:p.G50C,	chr11	124267100	124267100	C	A	379.515	297	T	P	No	NA
SNV	nonsynonymous SNV	DNAH9:NM_004662:exon15:c.T2272A:p.Y758N,DNAH9:NM_001372:exon69:c.T13336A:p.Y4446N,	chr17	11872719	11872719	T	A	73.7128	113	D	D	Yes	Yes
SNV	nonsynonymous SNV	MYO15A:NM_016239:exon46:c.C8391G:p.I2797M,	chr17	18058678	18058678	C	G	26.4705	39	NA	NA	No	Yes
SNV	nonsynonymous SNV	ITGA3:NM_002204:exon10:c.C1466T:p.S489F,ITGA3:NM_005501:exon10:c.C1466T:p.S489F,	chr17	48151895	48151895	C	T	47.4489	91	D	D	Yes	Yes
SNV	nonsynonymous SNV	C19orf57:NM_024323:exon6:c.C1247T:p.T416I,	chr19	14000422	14000422	G	A	47.8147	44	T	P	Yes	Yes
SNV	nonsynonymous SNV	ZNF573:NM_152360:exon8:c.A390T:p.K130N,ZNF573:NM_001172692:exon4:c.A300T:p.K100N,ZNF573:NM_001172689:exon6:c.A300T:p.K100N,ZNF573:NM_001172691:exon5:c.A558T:p.K186N,ZNF573:NM_001172690:exon5:c.A564T:p.K188N,	chr19	38230827	38230827	T	A	417.164	235	D	NA	No	Yes
SNV	nonsynonymous SNV	PPM1B:NM_001033557:exon2:c.A89C:p.Q30P,PPM1B:NM_002706:exon2:c.A89C:p.Q30P,PPM1B:NM_001033556:exon2:c.A89C:p.Q30P,PPM1B:NM_177968:exon2:c.A89C:p.Q30P,	chr2	44428427	44428427	A	C	390.083	453	D	D	No	Yes
SNV	nonsynonymous SNV	PIKFYVE:NM_015040:exon40:c.G6094T:p.V2032F,	chr2	209218871	209218871	G	T	182.249	212	D	B	No	Yes
SNV	nonsynonymous SNV	COL4A3:NM_000091:exon48:c.C4396G:p.P1466A,	chr2	228172569	228172569	C	G	180.848	226	NA	D	No	Yes
SNV	nonsynonymous SNV	AIFM3:NM_001018060:exon13:c.G1153C:p.E385Q,AIFM3:NM_001146288:exon13:c.G1171C:p.E391Q,AIFM3:NM_144704:exon13:c.G1153C:p.E385Q,	chr22	21331162	21331162	G	C	146.435	64	T	NA	No	Yes
SNV	nonsynonymous SNV	ZFP57:NM_001109809:exon4:c.C1254A:p.S418R,	chr6	29640634	29640634	G	T	68.5146	23	D	P	Yes	NA
SNV	nonsynonymous SNV	PRUNE2:NM_015225:exon2:c.G60T:p.K20N,	chr9	79469101	79469101	C	A	99.4121	90			No	Yes
SNV	nonsynonymous SNV	IPPK:NM_022755:exon10:c.G931C:p.E311Q,	chr9	95397576	95397576	C	G	75.9037	90	D	D	No	Yes
SNV	nonsynonymous SNV	OR13C3:NM_001001961:exon1:c.C761T:p.T254I,	chr9	107298334	107298334	G	A	341.829	339	D	D	Yes	NA
SNV	nonsynonymous SNV	DDX3X:NM_001356:exon14:c.C1582T:p.R528C,DDX3X:NM_001193417:exon13:c.C1534T:p.R512C,DDX3X:NM_001193416:exon14:c.C1582T:p.R528C,	chrX	41205842	41205842	C	T	277.148	165	NA	D	No	Yes
SNV	nonsynonymous SNV	IL1RAPL2:NM_017416:exon11:c.G2034T:p.E678D,	chrX	105011627	105011627	G	T	328.611	340	D	D	No	Yes
SNV	nonsynonymous SNV	F9:NM_000133:exon7:c.G787C:p.V263L,	chrX	138642963	138642963	G	C	284.867	294	T	P	No	Yes
SNV	synonymous SNV	AGT:NM_000029:exon2:c.G750A:p.K250K,	chr1	230845847	230845847	C	T	98.9229	107			No	NA
SNV	synonymous SNV	C3AR1:NM_004054:exon2:c.A555C:p.P185P,	chr12	8212227	8212227	T	G	181.566	336			No	NA
SNV	synonymous SNV	DICER1:NM_001195573:exon10:c.C1755A:p.I585I,DICER1:NM_177438:exon11:c.C1755A:p.I585I,DICER1:NM_030621:exon12:c.C1755A:p.I585I,	chr14	95582156	95582156	G	T	121.545	155			No	NA
SNV	synonymous SNV	ZEB2:NM_001171653:exon7:c.C873T:p.C291C,ZEB2:NM_014795:exon8:c.C945T:p.C315C,	chr2	145157809	145157809	G	A	159.147	107			No	NA
SNV	synonymous SNV	OTOR:NM_020157:exon2:c.A219G:p.V73V,	chr20	16729615	16729615	A	G	133.893	114			No	NA
SNV	synonymous SNV	KLHDC7B:NM_138433:exon1:c.A1308G:p.A436A,	chr22	50987903	50987903	A	G	61.8552	43			No	NA
SNV	synonymous SNV	ANGPTL2:NM_012098:exon3:c.G888C:p.P296P,	chr9	129856135	129856135	C	G	58.8462	70			No	NA

## Sheet: HCC4006
Variant_type	Variant_classification	Gene	Chr	Start	End	Ref	Alt	QUAL	DP	LJB_SIFT_Pred	LJB_PolyPhen2_Pred	Phosphorylation_site	Validation
SNV	nonsynonymous SNV	DCAF4L2:NM_152418:exon1:c.T101C:p.L34P,	chr8	88886099	88886099	A	G	123.078	126	D	D	No	No
SNV	nonsynonymous SNV	DYNC1H1:NM_001376:exon38:c.T7655G:p.V2552G,	chr14	102483143	102483143	T	G	17.8186	24	D	D	No	NA
SNV	nonsynonymous SNV	SH2D4B:NM_207372:exon3:c.C419T:p.A140V,SH2D4B:NM_001145719:exon3:c.C272T:p.A91V,	chr10	82331258	82331258	C	T	84.4784	71	T	D	No	NA
SNV	nonsynonymous SNV	HTR7:NM_019859:exon2:c.G856A:p.V286I,HTR7:NM_000872:exon2:c.G856A:p.V286I,HTR7:NM_019860:exon2:c.G856A:p.V286I,	chr10	92509035	92509035	C	T	59.7865	89	T	B	No	No
SNV	nonsynonymous SNV	GPR179:NM_001004334:exon1:c.T272C:p.L91P,	chr17	36499401	36499401	A	G	14.1453	24	D	P	No	No
SNV	nonsynonymous SNV	ASAP2:NM_003887:exon13:c.T1131G:p.F377L,ASAP2:NM_001135191:exon13:c.T1131G:p.F377L,	chr2	9496195	9496195	T	G	168.821	259	D	D	No	No
SNV	nonsynonymous SNV	USH2A:NM_206933:exon13:c.G2258A:p.G753D,USH2A:NM_007123:exon13:c.G2258A:p.G753D,	chr1	216420478	216420478	C	T	154.039	204	D	D	No	No
SNV	nonsynonymous SNV	NBPF11:NM_183372:exon6:c.G440C:p.R147T,	chr1	147597182	147597182	C	G	25.4996	24			No	NA
SNV	nonsynonymous SNV	SAR1A:NM_020150:exon7:c.C515T:p.P172L,SAR1A:NM_001142648:exon8:c.C515T:p.P172L,	chr10	71912314	71912314	G	A	153.429	135	D	D	No	No
SNV	nonsynonymous SNV	CKAP5:NM_014756:exon21:c.A2549G:p.D850G,CKAP5:NM_001008938:exon21:c.A2549G:p.D850G,	chr11	46800034	46800034	T	C	247.206	252	T	D	No	No
SNV	nonsynonymous SNV	LPCAT2:NM_017839:exon5:c.C671G:p.T224S,	chr16	55565854	55565854	C	G	91.8146	33	T	D	Yes	No
SNV	nonsynonymous SNV	INHBE:NM_031479:exon2:c.T811G:p.Y271D,	chr12	57850389	57850389	T	G	21.4335	30	D	D	Yes	NA
SNV	nonsynonymous SNV	CPA5:NM_001127442:exon11:c.T1198G:p.W400G,CPA5:NM_080385:exon13:c.T1283G:p.M428R,CPA5:NM_001127441:exon14:c.T1283G:p.M428R,	chr7	130008410	130008410	T	G	80.0528	108	NA	D	No	Yes
SNV	nonsynonymous SNV	TESK2:NM_007170:exon3:c.C287A:p.A96E,	chr1	45887454	45887454	G	T	210.829	325	T	B	No	Yes
SNV	stopgain SNV	FAM75A6:NM_001145196:exon4:c.G1978T:p.E660X,	chr9	43626709	43626709	C	A	362.188	256			No	NA
SNV	stopgain SNV	CTPS2:NM_175859:exon18:c.T1748A:p.L583X,CTPS2:NM_019857:exon18:c.T1748A:p.L583X,CTPS2:NM_001144002:exon18:c.T1748A:p.L583X,	chrX	16608929	16608929	A	T	202.911	175	NA	NA	No	NA
SNV	synonymous SNV	PPP1R9A:NM_001166163:exon10:c.C2532T:p.V844V,PPP1R9A:NM_001166160:exon12:c.C2598T:p.V866V,PPP1R9A:NM_001166162:exon10:c.C2532T:p.V844V,PPP1R9A:NM_001166161:exon10:c.C2532T:p.V844V,PPP1R9A:NM_017650:exon11:c.C2532T:p.V844V,	chr7	94881375	94881375	C	T	111.146	119			No	NA
SNV	synonymous SNV	SAR1A:NM_020150:exon7:c.C516T:p.P172P,SAR1A:NM_001142648:exon8:c.C516T:p.P172P,	chr10	71912313	71912313	G	A	161.204	135			No	NA
SNV	synonymous SNV	GCN1L1:NM_006836:exon57:c.C7818T:p.T2606T,	chr12	120567152	120567152	G	A	36.7227	36			Yes	NA
SNV	synonymous SNV	EDN1:NM_001168319:exon1:c.C31T:p.L11L,EDN1:NM_001955:exon1:c.C31T:p.L11L,	chr6	12290893	12290893	C	T	92.913	82			No	NA

[truncated: 1 more sheets: HCC4006ER]
